# Supplementary material for: Excitation landscape of the CP43 photosynthetic antenna complex from multiscale simulations
Source: Royal Society of Chemistry journal article supplement (doi:10.1039/d3sc06714a), 2024-01-01
Supplement: d3sc06714a1.pdf [file d3sc06714a1.pdf]

# Excitation landscape of the CP43 photosynthetic antenna complex from multiscale simulations

Sinjini Bhattacharjee<sup>a</sup>, Srilatha Arra<sup>b</sup>, Isabella Daidone<sup>\*b</sup>, Dimitrios A. Pantazis<sup>\*a</sup>

<sup>a</sup>Max-Planck-Institut für Kohlenforschung,  
Kaiser-Wilhelm-Platz 1, 45470 Mülheim an der Ruhr, Germany

<sup>b</sup>Department of Physical and Chemical Sciences, University of L'Aquila,  
via Vetoio (Coppito 1), 67010 L'Aquila, Italy

---

**ELECTRONIC SUPPLEMENTARY INFORMATION**

---

## Additional Computational Details

### *Molecular Dynamics (MD) simulations*

The initial structure of the Photosystem II (PSII) monomer used in this work is based on the high-resolution crystal structure of *T. vulcanus* (PDB ID: 3WU2).<sup>1</sup> The complete protein unit was embedded in a POPC lipid bilayer of dimension  $176 \times 176 \text{ \AA}^2$  using Packmol-Memgen,<sup>2</sup> thoroughly solvated with a TIP3P water box (**Figure S1**) and neutralized with appropriate number of counterions in a 0.15M NaCl salt buffer. For the protein residues, waters and POPC bilayer we used the standard parameters from the AMBERff14SB,<sup>3</sup> TIP3P<sup>4</sup> and LIPID17<sup>5</sup> force fields, respectively. The partial charges and force field parameters for the organic cofactors (plastoquinones, carotenoids, structural lipids) were obtained using GAFF2,<sup>6</sup> bonded parameters for non-heme Fe and OEC were taken from earlier studies,<sup>7-9</sup> while those of the remaining cofactors (Chl a, Pheo, heme) were obtained from literature.<sup>10, 11</sup> The nonbonded parameters for the metal ions were based on their respective oxidation states using data sets available for the TIP3P water model.<sup>12</sup> For  $\text{Na}^+$  and  $\text{Cl}^-$  ions, we used the Joung–Cheatham parameters compatible with the TIP3P water model.<sup>13, 14</sup>

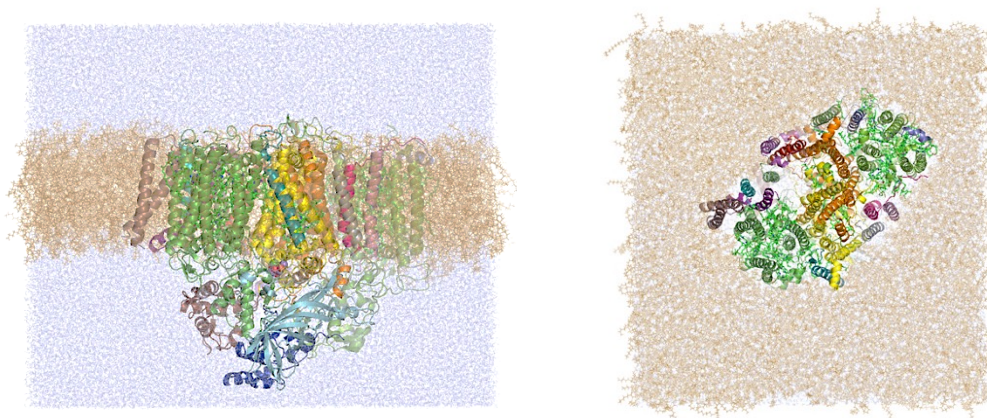

**Figure S1.** Side view and stromal (top) view of the molecular-mechanics (MM) model of the lipid bilayer bound PSII monomer used in this work ( $\text{Na}^+$  and  $\text{Cl}^-$  counterions not shown for clarity).

A step-by-step minimization protocol was employed to remove energetically unfavorable geometric clashes in the system. In the heating phase, the system is first heated from 10 to 100 K in a succession of 5 ps in the NvT ensemble, followed by further heating from 100 to 303 K in the NpT ensemble for a total of 125 ps. The temperature during this step is maintained using the Langevin dynamics<sup>15</sup> with a collision frequency of  $5 \text{ ps}^{-1}$ . During the equilibration phase, the  $\text{C}_\alpha$  atoms of amino acids were restrained with a force constant of  $20 \text{ kcal mol}^{-1} \text{ \AA}^{-2}$ . Subsequently, the restraints on the  $\text{C}_\alpha$  atoms were systematically reduced ( $2 \text{ kcal mol}^{-1} \text{ \AA}^{-2}/500$

ps) and the system was further equilibrated for 65 ns to equilibrate the POPC bilayer. Thereafter, production run was initiated without any restraints and the temperature and pressure set at 303 K and 1 atm, respectively. During the entire procedure, the temperature was controlled using Langevin dynamics with a collision frequency of  $1 \text{ ps}^{-1}$  and the system pressure was controlled using the Berendsen barostat<sup>16</sup> with anisotropic pressure scaling with a relaxation time of 2 ps. We employed the SHAKE algorithm<sup>17</sup> to constrain the bonds involving hydrogens, therefore a time step of 2 fs could be used. The electrostatic interactions were treated using the Particle Mesh Ewald (PME) approach<sup>18</sup> with a  $10 \text{ \AA}$  cut-off. The AMBER20 package<sup>19</sup> was used to perform the energy minimizations and equilibration dynamics while the production MD simulations were performed in the GPU version of the pmemd module (*pmemd.cuda*).<sup>20</sup>

### ***Calculation of the absorption spectrum with the MD-PMM approach***

For computing the absorption spectrum, after calculating the perturbed frequencies ( $\nu$ ) and transition dipoles ( $\mu_{j,i}$ ) for each exciton state over the frames of the MD trajectory, we evaluate the excitation energy distribution using a suitable number of frequency bins. Subsequently, we utilize the excitation energy distribution and the corresponding transition dipoles to determine the molar extinction coefficient  $\epsilon_{0,i}$  for the transitions from the ground to the  $i$ th excited state, thus providing the absorption spectrum according to:

$$\epsilon_{0,i} = \sum_{\nu_{\text{ref}}} \frac{\Gamma_A(\nu_{\text{ref}}) h \nu}{N} \frac{e^{-(\nu - \nu_{\text{ref}})^2 / 2\sigma^2}}{\sigma \sqrt{2\pi}} \quad (\text{S1})$$

$$\Gamma_A(\nu_{\text{ref}}) = \frac{|\mu_{0,j}|_{\nu_{\text{ref}}}^2}{6\epsilon_0 c \hbar^2} \quad (\text{S2})$$

Here,  $\nu_{\text{ref}}$ ,  $n(\nu_{\text{ref}})$  and  $|\mu_{0,j}|_{\nu_{\text{ref}}}^2$  are the frequency at the center of each bin, the corresponding number of MD frames and mean transition dipole square norm within the bin, respectively,  $\hbar = h/2\pi$  with  $h$  the Planck constant,  $\epsilon_0$  is the vacuum dielectric constant,  $c$  is the speed of light and  $\sigma^2$  is the variance associated to the semiclassical intra-QC vibrations neglected in the evaluation of the unperturbed properties. In the present case, the value of  $\sigma^2$  ( $\sigma = 10^{-4}$  Hartree) has been estimated on the basis of the full width at half maximum (FWHM) of the experimental spectrum of chlorophyll a in toluene,<sup>21</sup> approximating the vacuum condition. The calculated spectral line shape in the  $Q_y$  region is reported in **Figure S2**. Note that the width of the

calculated bands (inhomogeneous broadening) is due to the explicit effect of the semiclassical fluctuations of the QCs and their environment along the MD trajectory and does not include any adjustable parameter.

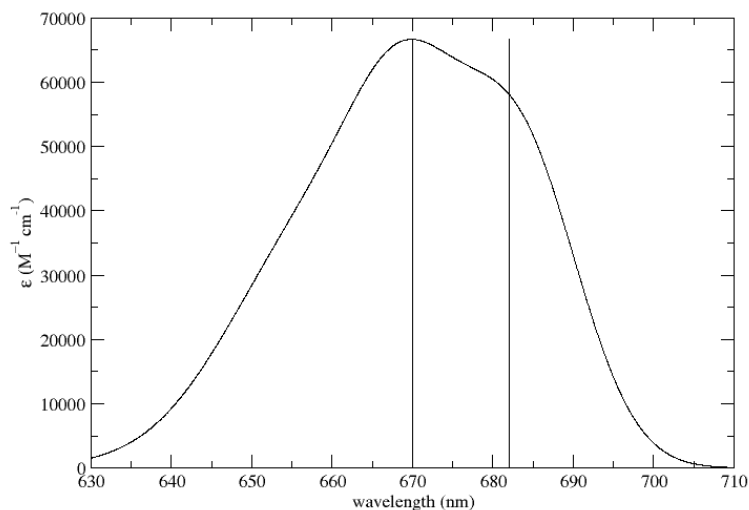

**Figure S2.** Room-temperature absorption spectrum of the CP43 complex calculated with the MD-PMM approach. The spectrum has been shifted by 0.000457 Hartree to lower energies in order to match the position of the main experimental peak measured at 293 K.

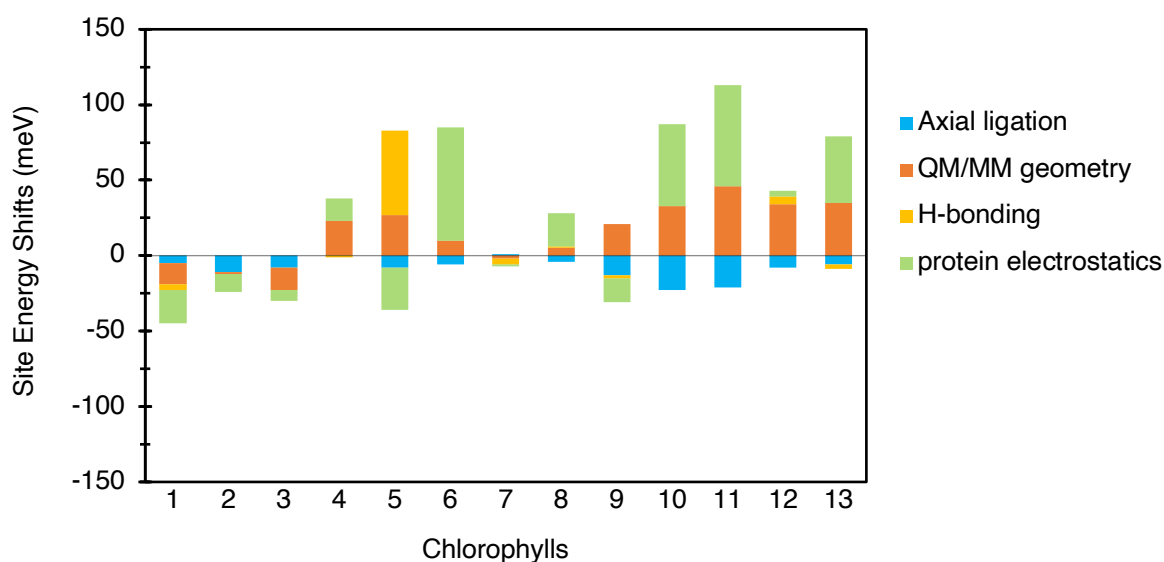

**Figure S3.** Decomposition of the electrostatic and non-electrostatic contributions (axial ligation, H-bonding, QM/MM geometry optimization) to the site energy shifts of the CP43 chlorophylls.

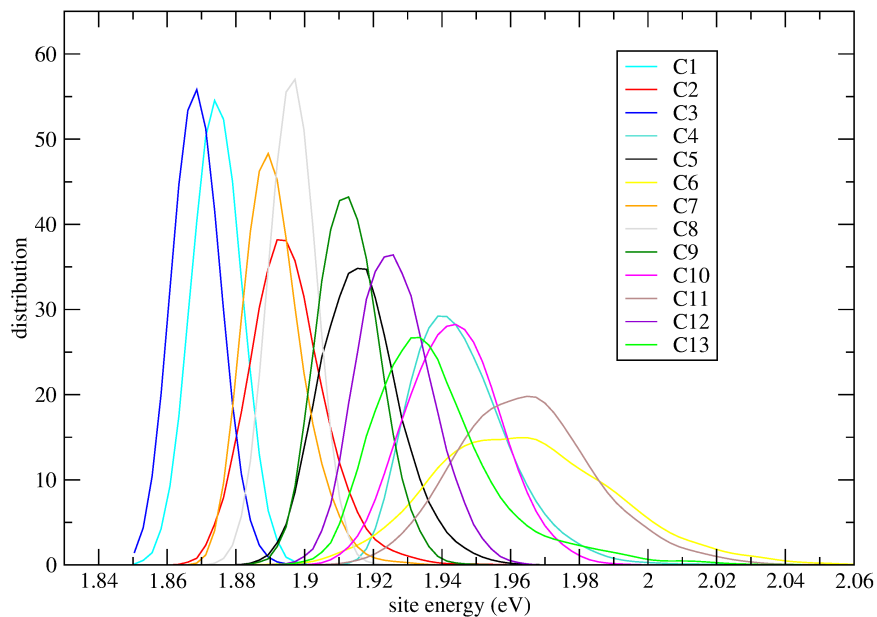

**Figure S4.** Distributions of the site energy for all Chl-a molecules (which include their respective axial ligands) in the CP43 complex performing the MD-PMM calculations over the last 30 ns of the MD trajectory (3000 frames in total).

**Table S1.** TD-DFT ( $\omega$ B97X-D3(BJ)/def2-TZVP) excitation energies  $E$  (in eV) of the  $S_2/Q_x$  states and corresponding oscillator strengths for the CP43 chlorophylls computed *in vacuo*, with QM/MM on an isolated CP43 protein, and with QM/MM in the complete PSII monomer. The geometries in all cases are derived from QM/MM optimizations within the PSII monomer. Shifts are reported in meV with respect to the gas-phase values.

| Site | TD-DFT<br>Gas-phase |           | TD-DFT   QM/MM<br>Isolated CP43 |           |       | TD-DFT   QM/MM<br>Full PSII monomer |           |       |
|------|---------------------|-----------|---------------------------------|-----------|-------|-------------------------------------|-----------|-------|
|      | $E$                 | $f_{osc}$ | $E$                             | $f_{osc}$ | Shift | $E$                                 | $f_{osc}$ | Shift |
| C1   | 2.354               | 0.04      | 2.296                           | 0.03      | -58   | 2.260                               | 0.02      | -94   |
| C2   | 2.372               | 0.04      | 2.307                           | 0.03      | -65   | 2.280                               | 0.02      | -92   |
| C3   | 2.370               | 0.02      | 2.303                           | 0.02      | -67   | 2.283                               | 0.01      | -87   |
| C4   | 2.427               | 0.03      | 2.359                           | 0.01      | -68   | 2.375                               | 0.02      | -52   |
| C5   | 2.475               | 0.16      | 2.417                           | 0.12      | -58   | 2.440                               | 0.15      | -35   |
| C6   | 2.383               | 0.06      | 2.457                           | 0.09      | 74    | 2.464                               | 0.11      | 81    |
| C7   | 2.421               | 0.05      | 2.392                           | 0.04      | -29   | 2.382                               | 0.05      | -39   |
| C8   | 2.394               | 0.05      | 2.412                           | 0.03      | 18    | 2.452                               | 0.07      | 58    |
| C9   | 2.404               | 0.06      | 2.354                           | 0.06      | -50   | 2.342                               | 0.06      | -62   |
| C10  | 2.362               | 0.07      | 2.424                           | 0.11      | 62    | 2.450                               | 0.12      | 88    |
| C11  | 2.371               | 0.07      | 2.473                           | 0.18      | 102   | 2.468                               | 0.17      | 97    |
| C12  | 2.418               | 0.08      | 2.433                           | 0.09      | 15    | 2.409                               | 0.09      | -9    |
| C13  | 2.423               | 0.07      | 2.413                           | 0.08      | -10   | 2.449                               | 0.12      | 26    |

**Table S2.** TD-DFT Transition Dipole moments of the CP43 chlorophylls *in vacuo*.

| Chl        | S <sub>0</sub> -S <sub>1</sub> |                                   |                     |                     |                     | S <sub>0</sub> -S <sub>2</sub> |                                   |                     |                     |                     |
|------------|--------------------------------|-----------------------------------|---------------------|---------------------|---------------------|--------------------------------|-----------------------------------|---------------------|---------------------|---------------------|
|            | T (debye)                      | T <sup>2</sup> (au <sup>2</sup> ) | T <sub>x</sub> (au) | T <sub>y</sub> (au) | T <sub>z</sub> (au) | T (debye)                      | T <sup>2</sup> (au <sup>2</sup> ) | T <sub>x</sub> (au) | T <sub>y</sub> (au) | T <sub>z</sub> (au) |
| <b>C1</b>  | 5.4223                         | 4.5507                            | 1.6598              | 0.9657              | 0.9292              | 1.7877                         | 0.4947                            | -0.0116             | -0.3280             | -0.6220             |
| <b>C2</b>  | 5.5418                         | 4.7535                            | 0.7559              | 1.9560              | -0.5969             | 1.9422                         | 0.5839                            | 0.0872              | -0.4145             | 0.6360              |
| <b>C3</b>  | 5.6286                         | 4.9036                            | 1.6110              | -1.4899             | -0.2976             | 1.6609                         | 0.4270                            | -0.2455             | 0.2258              | 0.5619              |
| <b>C4</b>  | 5.5886                         | 4.8341                            | -1.4121             | -1.5491             | -0.6636             | 1.8808                         | 0.5475                            | 0.1257              | 0.3485              | 0.6405              |
| <b>C5</b>  | 5.5772                         | 4.8146                            | 1.3595              | -1.2380             | -1.1974             | 2.8896                         | 1.2924                            | -0.1356             | 0.1439              | 1.1195              |
| <b>C6</b>  | 5.4903                         | 4.6656                            | 0.5175              | 2.0624              | 0.3799              | 2.5398                         | 0.9984                            | -0.4580             | -0.5103             | -0.7268             |
| <b>C7</b>  | 5.6640                         | 4.9655                            | 2.0657              | 0.4489              | -0.7050             | 2.0711                         | 0.6639                            | -0.6712             | -0.3362             | -0.3168             |
| <b>C8</b>  | 5.5771                         | 4.8142                            | -1.5829             | 1.2619              | -0.8464             | 2.3161                         | 0.8303                            | 0.2265              | -0.3135             | 0.8250              |
| <b>C9</b>  | 5.5291                         | 4.7318                            | 0.7763              | 2.0238              | -0.1832             | 2.1829                         | 0.7375                            | 0.0540              | 0.5222              | -0.6796             |
| <b>C10</b> | 5.4721                         | 4.6347                            | 0.7634              | 1.8828              | -0.7121             | 2.8377                         | 1.2464                            | 0.2472              | -0.5897             | 0.9152              |
| <b>C11</b> | 5.4245                         | 4.5545                            | -0.8384             | 0.8208              | -1.7827             | 2.7056                         | 1.1331                            | 0.1478              | -0.0549             | -1.0527             |
| <b>C12</b> | 5.4414                         | 4.5830                            | 1.0225              | -1.8759             | 0.1356              | 2.6893                         | 1.1194                            | -0.2525             | 0.7593              | 0.6922              |
| <b>C13</b> | 5.5280                         | 4.7298                            | -1.7554             | -0.9651             | 0.8468              | 2.8140                         | 1.2257                            | 0.5441              | -0.0466             | -0.9631             |

**Table S3.** Comparison of CP43 chlorophyll site energies from the literature. All values are in eV.

| Site       | Muh et al. <sup>22 a</sup> | Muh et al. <sup>22 b</sup> | Shibata et al. <sup>23 c</sup> | Shibata et al. <sup>23 d</sup> | Sarnagadharan et al. <sup>24</sup> | Saito et al. <sup>25</sup> | QM/MM (this work) | PMM (this work) |
|------------|----------------------------|----------------------------|--------------------------------|--------------------------------|------------------------------------|----------------------------|-------------------|-----------------|
| <b>C1</b>  | 1.839                      | 1.843                      | 1.853                          | 1.842                          | 1.818                              | 2.127                      | 1.846             | 1.873           |
| <b>C2</b>  | 1.851                      | 1.857                      | 1.860                          | 1.863                          | 1.831                              | 2.154                      | 1.867             | 1.894           |
| <b>C3</b>  | 1.843                      | 1.840                      | 1.853                          | 1.862                          | 1.817                              | 2.114                      | 1.861             | 1.867           |
| <b>C4</b>  | 1.845                      | 1.843                      | 1.831                          | 1.829                          | 1.866                              | 2.142                      | 1.928             | 1.945           |
| <b>C5</b>  | 1.846                      | 1.847                      | 1.853                          | 1.834                          | 1.842                              | 2.152                      | 1.938             | 1.915           |
| <b>C6</b>  | 1.861                      | 1.859                      | 1.853                          | 1.855                          | 1.851                              | 2.129                      | 1.970             | 1.963           |
| <b>C7</b>  | 1.839                      | 1.838                      | 1.833                          | 1.841                          | 1.842                              | 2.122                      | 1.885             | 1.890           |
| <b>C8</b>  | 1.834                      | 1.832                      | 1.846                          | 1.856                          | 1.841                              | 2.122                      | 1.915             | 1.895           |
| <b>C9</b>  | 1.828                      | 1.834                      | 1.825                          | 1.818                          | 1.848                              | 2.096                      | 1.881             | 1.912           |
| <b>C10</b> | 1.836                      | 1.835                      | 1.884                          | 1.902                          | 1.845                              | 2.115                      | 1.955             | 1.942           |
| <b>C11</b> | 1.823                      | 1.823                      | 1.862                          | 1.830                          | 1.831                              | 2.136                      | 1.986             | 1.964           |
| <b>C12</b> | 1.833                      | 1.839                      | 1.849                          | 1.842                          | 1.839                              | 2.110                      | 1.926             | 1.925           |
| <b>C13</b> | 1.861                      | 1.858                      | 1.873                          | 1.870                          | 1.865                              | 2.142                      | 1.961             | 1.937           |

<sup>a</sup> Based on 3ARC<sup>1</sup><sup>b</sup> Based on 4IL6<sup>26</sup><sup>c</sup> Fit of linear optical spectra<sup>d</sup> Fit of absorption and LD spectra

**Table S4.** Excitonic coupling constants (upper panel) and corresponding standard deviations (lower panel) between CP43 chlorophylls computed using the MD-PMM approach. All values are reported in  $\text{cm}^{-1}$ .

| Chl | C1   | C2    | C3    | C4     | C5    | C6     | C7     | C8    | C9      | C10    | C11     | C12    | C13    |
|-----|------|-------|-------|--------|-------|--------|--------|-------|---------|--------|---------|--------|--------|
| C1  |      | 10.89 | 21.90 | 3.09   | -3.07 | -12.22 | 21.05  | 7.15  | 10.89   | 2.70   | -2.52   | 0.63   | -0.11  |
| C2  | 6.05 |       | 8.14  | 154.07 | -8.67 | -16.15 | -1.01  | 16.94 | 23.26   | 73.09  | 5.05    | 12.33  | -10.27 |
| C3  | 5.31 | 7.89  |       | -36.43 | 4.48  | -0.45  | 7.88   | -4.39 | -11.26  | 23.04  | 8.19    | 25.02  | 5.71   |
| C4  | 1.07 | 8.80  | 3.02  |        | -3.40 | 4.57   | -2.08  | -1.53 | -0.97   | -34.68 | -4.46   | -4.72  | 5.09   |
| C5  | 0.86 | 1.08  | 0.36  | 0.48   |       | 25.46  | -98.32 | -5.90 | -31.38  | -1.18  | -0.81   | -1.55  | 5.03   |
| C6  | 1.38 | 0.72  | 0.64  | 0.20   | 1.88  |        | -77.69 | -1.14 | -32.26  | -12.14 | -4.85   | -4.15  | 10.23  |
| C7  | 1.53 | 1.89  | 0.98  | 0.42   | 5.26  | 15.33  |        | 17.84 | -112.59 | -4.61  | -9.06   | -34.46 | 26.34  |
| C8  | 0.25 | 0.87  | 0.47  | 0.81   | 3.34  | 0.54   | 2.23   |       | 130.37  | 66.94  | 1.78    | 2.11   | -5.16  |
| C9  | 0.71 | 1.85  | 1.11  | 0.86   | 1.45  | 1.32   | 10.64  | 10.68 |         | 16.20  | -117.64 | 36.43  | -6.15  |
| C10 | 1.12 | 7.47  | 2.36  | 3.33   | 1.13  | 0.46   | 1.95   | 4.51  | 12.58   |        | -97.23  | 19.40  | -11.76 |
| C11 | 0.34 | 0.73  | 0.72  | 0.67   | 0.42  | 0.26   | 0.64   | 4.72  | 5.37    | 5.87   |         | 25.24  | -13.91 |
| C12 | 0.79 | 1.40  | 2.18  | 0.46   | 0.66  | 1.56   | 5.37   | 0.90  | 6.66    | 1.77   | 1.07    |        | -48.50 |
| C13 | 0.57 | 0.38  | 1.15  | 0.18   | 0.26  | 0.45   | 0.87   | 0.41  | 1.72    | 0.74   | 1.11    | 9.71   |        |

**Table S5.** Relative center-to-center distances (in Å) of the 13 CP43 Chls, Chl<sub>ZD1</sub> and D1-RC pigments based on the 3WU2 crystal structure.<sup>1</sup> Distances less than 12 Å are shown in red, 12–15 Å are shown in pink. In CP43, C5 is closest the D1 pigments (Chl<sub>ZD1</sub>, Phe<sub>D1</sub> and Chl<sub>D1</sub>) while C4 is closer to P<sub>D1</sub> (distances in green).

|                    | C1 | C2   | C3   | C4   | C5   | C6   | C7   | C8   | C9   | C10  | C11  | C12  | C13  | Chl <sub>ZD1</sub> |      |
|--------------------|----|------|------|------|------|------|------|------|------|------|------|------|------|--------------------|------|
| C2                 |    | 13.1 |      |      |      |      |      |      |      |      |      |      |      |                    |      |
| C3                 |    | 12.7 | 12.1 |      |      |      |      |      |      |      |      |      |      |                    |      |
| C4                 |    | 22.0 | 11.2 | 16.3 |      |      |      |      |      |      |      |      |      |                    |      |
| C5                 |    | 23.9 | 20.9 | 29.3 | 30.5 |      |      |      |      |      |      |      |      |                    |      |
| C6                 |    | 16.9 | 24.1 | 25.3 | 35.1 | 16.9 |      |      |      |      |      |      |      |                    |      |
| C7                 |    | 18.8 | 18.9 | 22.1 | 29.4 | 12.1 | 8.7  |      |      |      |      |      |      |                    |      |
| C8                 |    | 26.5 | 17.5 | 24.9 | 23.6 | 14.6 | 24.1 | 15.5 |      |      |      |      |      |                    |      |
| C9                 |    | 22.5 | 16.4 | 19.1 | 23.6 | 17.9 | 19.9 | 11.7 | 9.1  |      |      |      |      |                    |      |
| C10                |    | 20.8 | 10.2 | 15.1 | 14.3 | 21.6 | 25.8 | 18.3 | 11.4 | 9.6  |      |      |      |                    |      |
| C11                |    | 31.2 | 21.9 | 24.5 | 24.4 | 25.9 | 30.5 | 22.2 | 11.9 | 10.7 | 11.8 |      |      |                    |      |
| C12                |    | 20.0 | 20.7 | 16.4 | 28.6 | 24.7 | 16.7 | 13.3 | 20.8 | 12.0 | 17.5 | 20.0 |      |                    |      |
| C13                |    | 28.0 | 26.0 | 19.9 | 30.6 | 32.8 | 26.8 | 22.5 | 24.7 | 16.1 | 19.9 | 18.3 | 10.4 |                    |      |
| Chl <sub>ZD1</sub> |    | 33.7 | 34.3 | 43.7 | 42.4 | 21.9 | 31.2 | 31.4 | 34.9 | 38.9 | 39.8 | 46.6 | 43.8 | 53.0               |      |
| Chl <sub>D1</sub>  |    | 41.0 | 33.3 | 45.4 | 35.4 | 28.5 | 44.0 | 39.2 | 31.9 | 39.6 | 36.3 | 41.8 | 49.1 | 55.1               | 24.7 |
| Phe <sub>D1</sub>  |    | 39.0 | 30.8 | 42.6 | 34.7 | 21.5 | 38.3 | 32.7 | 24.4 | 32.7 | 31.4 | 34.7 | 43.0 | 48.7               | 24.3 |
| P <sub>D1</sub>    |    | 38.9 | 29.1 | 40.8 | 28.1 | 30.6 | 45.1 | 39.3 | 29.7 | 37.0 | 31.6 | 37.4 | 46.8 | 51.3               | 32.0 |

**Table S6.** QM/MM and TD-DFT ( $\omega$ B97X-D3(BJ)/def2-TZVP) computed excitation energies (in eV) and corresponding oscillator strengths and NTO analysis for selected chlorophyll pairs in CP43. The geometries in all cases are derived from QM/MM optimizations of the pigments embedded inside the complete PSII monomer for snapshot 1. (LE: local excitations, CT: Charge Transfer states).

| Pair           | Mg-Mg (Å) | State | Es (eV)                   | $f_{osc}$ | NTO character                                          | weight |             |
|----------------|-----------|-------|---------------------------|-----------|--------------------------------------------------------|--------|-------------|
| <b>C12-C13</b> | 10.1      | 1     | 1.920                     | 0.21      | LE (C12)                                               | 0.84   |             |
|                |           |       |                           |           | LE (C12)                                               | 0.19   |             |
|                |           | 2     | 1.967                     | 0.24      | LE (C13)                                               | 0.83   |             |
|                |           |       |                           |           | LE (C13)                                               | 0.19   |             |
|                |           | 3     | 2.410                     | 0.06      | LE (C12)                                               | 0.77   |             |
| LE (C12)       | 0.24      |       |                           |           |                                                        |        |             |
| 4              | 2.46      | 0.15  | LE (C13)                  | 0.81      |                                                        |        |             |
|                |           |       | LE (C13)                  | 0.19      |                                                        |        |             |
| 5              | 3.222     | 0.12  | delocalized exciton + CT  |           | 0.88                                                   |        |             |
| <b>C2-C10</b>  | 10.4      | 1     | 1.843                     | 0.13      | LE(C2)                                                 | 0.84   |             |
|                |           |       |                           |           | LE(C2)                                                 | 0.20   |             |
|                |           | 2     | 1.943                     | 0.26      | <b>LE (C10) + CT (C2 <math>\rightarrow</math> C10)</b> |        | <b>0.86</b> |
|                |           |       |                           |           | LE (C10)                                               | 0.10   |             |
|                |           | 3     | 2.001                     | 0.07      | <b>LE (C10) + CT (C2 <math>\rightarrow</math> C10)</b> |        | <b>0.89</b> |
| LE (C10)       | 0.10      |       |                           |           |                                                        |        |             |
| 4              | 2.255     | 0.03  | LE(C2)                    | 0.69      |                                                        |        |             |
|                |           |       | LE(C2)                    | 0.34      |                                                        |        |             |
| 5              | 2.465     | 0.17  | LE (C10)                  | 0.83      |                                                        |        |             |
|                |           |       | LE (C10)                  | 0.19      |                                                        |        |             |
| <b>C6-C7</b>   | 9.0       | 1     | 1.885                     | 0.13      | LE(C7)                                                 | 0.84   |             |
|                |           |       |                           |           | LE(C7)                                                 | 0.20   |             |
|                |           | 2     | 1.963                     | 0.26      | LE (C6)                                                | 0.84   |             |
|                |           |       |                           |           | LE (C6)                                                | 0.19   |             |
|                |           | 3     | 2.384                     | 0.07      | LE(C7)                                                 | 0.74   |             |
| LE(C7)         | 0.28      |       |                           |           |                                                        |        |             |
| 4              | 2.453     | 0.03  | LE (C6)                   | 0.79      |                                                        |        |             |
|                |           |       | LE (C6)                   | 0.21      |                                                        |        |             |
| 5              | 3.218     | 0.17  | delocalized exciton + CT  |           | 0.80                                                   |        |             |
| <b>C8-C9</b>   | 9.5       | 1     | 1.882                     | 0.23      | LE(C9)                                                 | 0.82   |             |
|                |           |       |                           |           | LE(C9)                                                 | 0.20   |             |
|                |           | 2     | 1.913                     | 0.24      | LE (C8)                                                | 0.83   |             |
|                |           |       |                           |           | LE (C8)                                                | 0.18   |             |
|                |           | 3     | 2.352                     | 0.04      | LE(C9)                                                 | 0.77   |             |
| LE(C9)         | 0.25      |       |                           |           |                                                        |        |             |
| 4              | 2.441     | 0.06  | LE (C8)                   | 0.75      |                                                        |        |             |
|                |           |       | LE (C8)                   | 0.26      |                                                        |        |             |
| 5              | 3.251     | 0.33  | LE(C9)                    | 0.67      |                                                        |        |             |
|                |           |       | LE(C9)                    | 0.27      |                                                        |        |             |
| <b>C9-C10</b>  | 9.3       | 1     | 1.888                     | 0.17      | LE(C9)                                                 | 0.83   |             |
|                |           |       |                           |           | LE(C9)                                                 | 0.20   |             |
|                |           | 2     | 1.942                     | 0.25      | LE(C10)                                                | 0.84   |             |
|                |           |       |                           |           | LE(C10)                                                | 0.18   |             |
|                |           | 3     | 2.365                     | 0.04      | LE(C9)                                                 | 0.76   |             |
| LE(C9)         | 0.26      |       |                           |           |                                                        |        |             |
| 4              | 2.433     | 0.11  | LE(C10)                   | 0.81      |                                                        |        |             |
|                |           |       | LE(C10)                   | 0.21      |                                                        |        |             |
| 5              | 3.094     | 0.00  | CT (C10 $\rightarrow$ C9) |           | 1.00                                                   |        |             |
| <b>C7-C9</b>   | 11.4      | 1     | 1.868                     | 0.39      | LE (C9)                                                | 0.44   |             |
|                |           |       |                           |           | LE (C7)                                                | 0.41   |             |



|                |      |   |       |       |                |      |
|----------------|------|---|-------|-------|----------------|------|
|                |      | 2 | 1.891 | 0.09  | LE (C7)        | 0.43 |
|                |      |   |       |       | LE (C9)        | 0.40 |
|                |      | 3 | 2.350 | 0.07  | LE (C9)        | 0.73 |
|                |      |   |       |       | LE (C9)        | 0.24 |
|                |      | 4 | 2.37  | 0.04  | LE (C7)        | 0.69 |
|                |      |   |       |       | LE (C7)        | 0.28 |
|                |      | 5 | 3.278 | 0.30  | LE (C9)        | 0.44 |
|                |      |   |       |       | LE (C7)        | 0.28 |
| <b>C9-C11</b>  | 11.0 | 1 | 1.864 | 0.30  | LE (C9)        | 0.83 |
|                |      |   |       |       | LE (C9)        | 0.20 |
|                |      | 2 | 1.981 | 0.20  | LE (C11)       | 0.83 |
|                |      |   |       |       | LE (C11)       | 0.18 |
|                |      | 3 | 2.329 | 0.07  | LE (C9)        | 0.76 |
|                |      |   |       |       | LE (C9)        | 0.27 |
|                |      | 4 | 2.466 | 0.14  | LE (C11)       | 0.83 |
|                |      |   |       |       | LE (C11)       | 0.19 |
|                |      | 5 | 3.071 | 0.00  | CT (C9 → C11)  | 1.00 |
| <b>C2-C4</b>   | 11.8 | 1 | 1.868 | 0.32  | LE(C2)         | 0.75 |
|                |      |   |       |       | LE(C2)         | 0.20 |
|                |      | 2 | 1.899 | 0.098 | LE(C4)         | 0.73 |
|                |      |   |       |       | LE(C4)         | 0.22 |
|                |      | 3 | 2.291 | 0.02  | LE(C2)         | 0.69 |
|                |      |   |       |       | LE(C2)         | 0.34 |
|                |      | 4 | 2.320 | 0.00  | LE(C4)         | 0.63 |
|                |      |   |       |       | LE(C4)         | 0.40 |
|                |      | 5 | 3.166 | 0.64  | LE(C4)         | 0.61 |
|                |      |   |       |       | LE(C4)         | 0.42 |
| <b>C8-C10</b>  | 11.2 | 1 | 1.899 | 0.23  | LE(C8)         | 0.80 |
|                |      |   |       |       | LE(C8)         | 0.17 |
|                |      | 2 | 1.950 | 0.24  | LE(C10)        | 0.80 |
|                |      |   |       |       | LE(C10)        | 0.17 |
|                |      | 3 | 2.439 | 0.16  | LE(C8)         | 0.62 |
|                |      |   |       |       | LE(C8)         | 0.22 |
|                |      | 4 | 2.445 | 0.04  | LE(C10)        | 0.67 |
|                |      |   |       |       | LE(C10)        | 0.18 |
|                |      | 5 | 3.127 | 0.00  | CT (C10 → C8)  | 1.00 |
| <b>C10-C11</b> | 11.9 | 1 | 1.958 | 0.34  | LE(C10)        | 0.80 |
|                |      |   |       |       | LE(C10)        | 0.17 |
|                |      | 2 | 1.994 | 0.18  | LE(C11)        | 0.79 |
|                |      |   |       |       | LE(C11)        | 0.17 |
|                |      | 3 | 2.451 | 0.26  | LE(C10)        | 0.75 |
|                |      |   |       |       | LE(C10)        | 0.17 |
|                |      | 4 | 2.484 | 0.11  | LE(C11)        | 0.76 |
|                |      |   |       |       | LE(C11)        | 0.16 |
|                |      | 5 | 2.546 | 0.00  | CT (C10 → C11) | 1.00 |
| <b>C5-C7</b>   | 12.1 | 1 | 1.882 | 0.35  | LE(C7)         | 0.78 |
|                |      |   |       |       | LE(C7)         | 0.18 |
|                |      | 2 | 1.933 | 0.17  | LE(C5)         | 0.79 |
|                |      |   |       |       | LE(C5)         | 0.16 |
|                |      | 3 | 2.392 | 0.05  | LE(C7)         | 0.72 |
|                |      |   |       |       | LE(C7)         | 0.30 |
|                |      | 4 | 2.440 | 0.13  | LE(C5)         | 0.83 |
|                |      |   |       |       | LE(C5)         | 0.19 |
|                |      | 5 | 3.331 | 0.50  | LE(C7)         | 0.64 |
|                |      |   |       |       | LE(C7)         | 0.34 |

**Table S7.** QM/MM and TD-DFT ( $\omega$ B97X-D3(BJ)/def2-TZVP) computed excitation energies (in eV) and corresponding oscillator strengths and NTO analysis for the C2-C10 pair in CP43. The geometries in all cases are derived from QM/MM optimizations of the pigments embedded inside the complete PSII monomer in snapshots 2-10 (LE: local excitations, CT: Charge Transfer states).

| Snapshot | Mg-Mg (Å) | State | Es (eV) | $f_{osc}$ | NTO character                  | weights     |
|----------|-----------|-------|---------|-----------|--------------------------------|-------------|
| <b>2</b> | 10.6      | 1     | 1.875   | 0.20      | LE(C2)                         | 0.83        |
|          |           |       |         |           | LE(C2)                         | 0.22        |
|          |           | 2     | 1.967   | 0.26      | LE (C10)                       | 0.85        |
|          |           |       |         |           | LE (C10)                       | 0.18        |
|          |           | 3     | 2.230   | 0.00      | <b>CT (C2 → C10)</b>           | <b>0.98</b> |
|          |           | 4     | 2.320   | 0.04      | LE(C2)                         | 0.69        |
|          |           |       |         |           | LE(C2)                         | 0.34        |
|          |           | 5     | 2.478   | 0.15      | LE (C10)                       | 0.80        |
|          |           |       |         |           | LE (C10)                       | 0.21        |
| <b>3</b> | 10.3      | 1     | 1.838   | 0.12      | <b>LE (C2) + CT (C2 → C10)</b> | <b>0.87</b> |
|          |           |       |         |           | LE(C2)                         | 0.17        |
|          |           | 2     | 1.901   | 0.10      | <b>LE (C2) + CT (C2 → C10)</b> | <b>0.94</b> |
|          |           |       |         |           | LE(C2)                         | 0.06        |
|          |           | 3     | 1.998   | 0.23      | LE (C10)                       | 0.85        |
|          |           |       |         |           | LE (C10)                       | 0.18        |
|          |           | 4     | 2.273   | 0.02      | LE(C2)                         | 0.68        |
|          |           |       |         |           | LE(C2)                         | 0.35        |
|          |           | 5     | 2.447   | 0.01      | <b>CT (C2 → C10)</b>           | <b>0.98</b> |
| <b>4</b> | 10.3      | 1     | 1.868   | 0.18      | LE(C2)                         | 0.83        |
|          |           |       |         |           | LE(C2)                         | 0.22        |
|          |           | 2     | 1.979   | 0.27      | LE (C10)                       | 0.85        |
|          |           |       |         |           | LE (C10)                       | 0.17        |
|          |           | 3     | 2.099   | 0.00      | <b>CT (C2 → C10)</b>           | <b>0.99</b> |
|          |           | 4     | 2.298   | 0.04      | LE(C2)                         | 0.69        |
|          |           |       |         |           | LE(C2)                         | 0.34        |
|          |           | 5     | 2.491   | 0.18      | LE (C10)                       | 0.81        |
|          |           |       |         |           | LE (C10)                       | 0.20        |
| <b>5</b> | 10.1      | 1     | 1.869   | 0.18      | LE(C2)                         | 0.83        |
|          |           |       |         |           | LE(C2)                         | 0.22        |
|          |           | 2     | 1.953   | 0.28      | LE (C10)                       | 0.85        |
|          |           |       |         |           | LE (C10)                       | 0.18        |
|          |           | 3     | 2.237   | 0.00      | <b>CT (C2 → C10)</b>           | <b>0.98</b> |
|          |           | 4     | 2.279   | 0.04      | LE(C2)                         | 0.69        |
|          |           |       |         |           | LE(C2)                         | 0.34        |
|          |           | 5     | 2.461   | 0.14      | LE (C10)                       | 0.80        |
|          |           |       |         |           | LE (C10)                       | 0.22        |
| <b>6</b> | 10.1      | 1     | 1.855   | 0.19      | LE(C2)                         | 0.83        |
|          |           |       |         |           | LE(C2)                         | 0.22        |
|          |           | 2     | 1.981   | 0.29      | LE (C10)                       | 0.85        |
|          |           |       |         |           | LE (C10)                       | 0.17        |
|          |           | 3     | 2.237   | 0.00      | <b>CT (C2 → C10)</b>           | <b>0.90</b> |
|          |           | 4     | 2.288   | 0.03      | LE(C2)                         | 0.58        |
|          |           |       |         |           | LE(C2)                         | 0.44        |

|           |      |   |       |      |                                 |             |
|-----------|------|---|-------|------|---------------------------------|-------------|
|           |      | 5 | 2.509 | 0.17 | LE (C10)                        | 0.81        |
|           |      |   |       |      | LE (C10)                        | 0.21        |
| <b>7</b>  | 10.2 | 1 | 1.842 | 0.18 | LE(C2)                          | 0.84        |
|           |      |   |       |      | LE(C2)                          | 0.21        |
|           |      | 2 | 1.966 | 0.15 | <b>LE (C10) + CT (C2 → C10)</b> | <b>0.92</b> |
|           |      |   |       |      | LE (C10)                        | 0.10        |
|           |      | 3 | 2.018 | 0.14 | <b>LE (C10) + CT (C2 → C10)</b> | <b>0.88</b> |
|           |      |   |       |      | LE (C10)                        | 0.12        |
|           |      | 4 | 2.271 | 0.04 | LE(C2)                          | 0.69        |
|           |      |   |       |      | LE(C2)                          | 0.34        |
|           |      | 5 | 2.509 | 0.14 | LE (C10)                        | 0.87        |
|           |      |   |       |      | LE (C10)                        | 0.14        |
| <b>8</b>  | 10.4 | 1 | 1.859 | 0.17 | LE(C2)                          | 0.83        |
|           |      |   |       |      | LE(C2)                          | 0.21        |
|           |      | 2 | 1.939 | 0.31 | LE (C10)                        | 0.85        |
|           |      |   |       |      | LE (C10)                        | 0.17        |
|           |      | 3 | 2.102 | 0.00 | <b>CT (C2 → C10)</b>            | <b>0.99</b> |
|           |      | 4 | 2.282 | 0.04 | LE(C2)                          | 0.70        |
|           |      |   |       |      | LE(C2)                          | 0.33        |
|           |      | 5 | 2.461 | 0.15 | LE (C10)                        | 0.81        |
|           |      |   |       |      | LE (C10)                        | 0.20        |
| <b>9</b>  | 9.9  | 1 | 1.803 | 0.11 | <b>LE (C2) + CT (C2 → C10)</b>  | <b>0.88</b> |
|           |      |   |       |      | LE(C2)                          | 0.15        |
|           |      | 2 | 1.895 | 0.13 | <b>LE (C2) + CT (C2 → C10)</b>  | <b>0.91</b> |
|           |      |   |       |      | LE(C2)                          | 0.10        |
|           |      | 3 | 1.955 | 0.23 | LE (C10)                        | 0.86        |
|           |      |   |       |      | LE (C10)                        | 0.17        |
|           |      | 4 | 2.240 | 0.03 | LE(C2)                          | 0.69        |
|           |      |   |       |      | LE(C2)                          | 0.34        |
|           |      | 5 | 2.440 | 0.05 | <b>LE (C10) + CT (C2 → C10)</b> | <b>0.94</b> |
| <b>10</b> | 10.5 | 1 | 1.856 | 0.18 | LE(C2)                          | 0.83        |
|           |      |   |       |      | LE(C2)                          | 0.23        |
|           |      | 2 | 1.923 | 0.29 | LE (C10)                        | 0.85        |
|           |      |   |       |      | LE (C10)                        | 0.18        |
|           |      | 3 | 2.257 | 0.00 | <b>LE (C2) + CT (C2 → C10)</b>  | <b>0.59</b> |
|           |      |   |       |      | LE (C10)                        | 0.42        |
|           |      | 4 | 2.309 | 0.04 | <b>LE (C2) + CT (C2 → C10)</b>  | <b>0.76</b> |
|           |      |   |       |      | LE(C2)                          | 0.24        |
|           |      | 5 | 2.436 | 0.13 | LE (C10)                        | 0.80        |
|           |      |   |       |      | LE (C10)                        | 0.22        |

**Snapshot 2 (5 ns), S3**

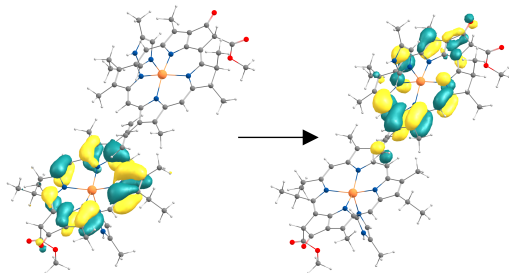

**Snapshot 3 (10 ns), S1 and S2**

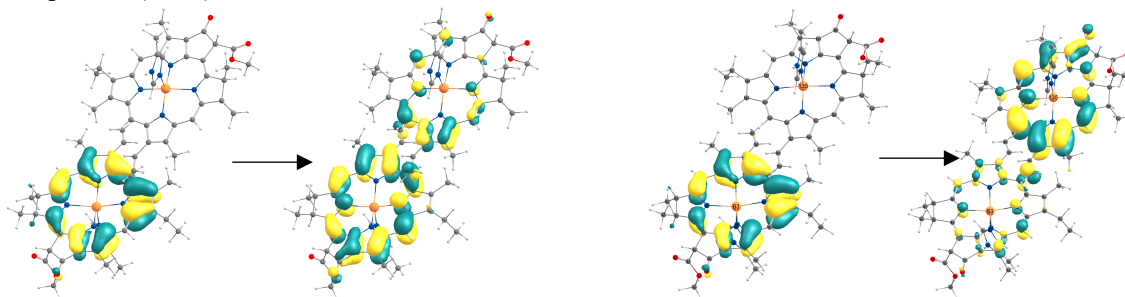

**Snapshot 4 (15 ns), S3**

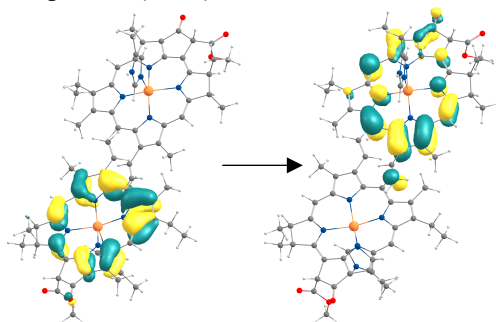

**Snapshot 5 (20 ns), S3**

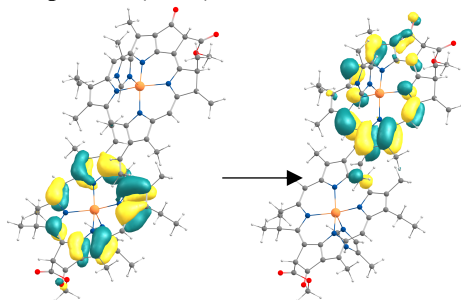

**Snapshot 6 (25 ns), S3**

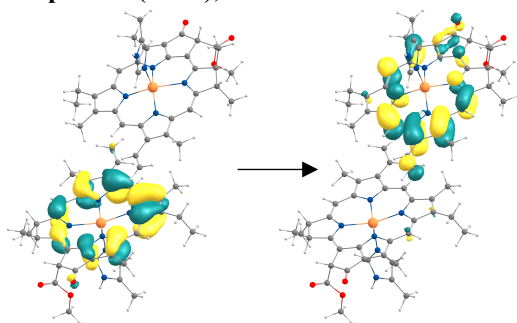

**Figure S5.** Natural Transition Orbitals (NTOs) for the lowest excited state with significant CT character for the C2-C10 dimer in snapshots 2-10.

**Snapshot 7 (30 ns), S2**

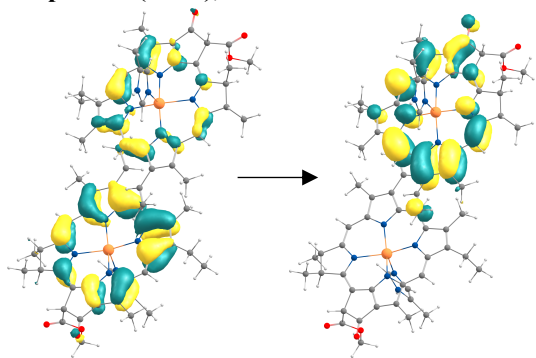

**Snapshot 8 (35 ns), S3**

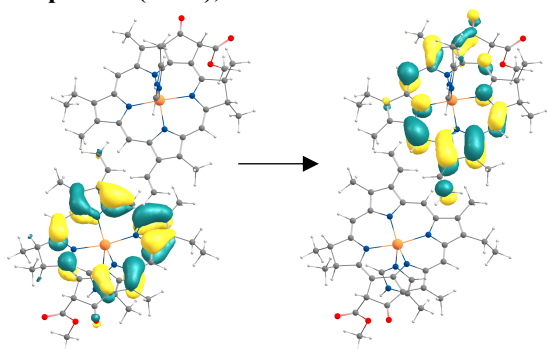

**Snapshot 9 (40 ns), S1 and S2**

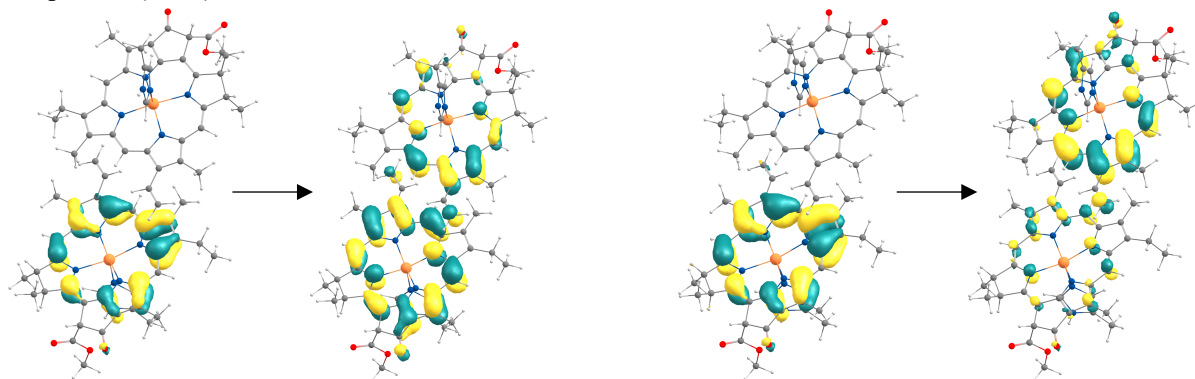

**Snapshot 10 (45ns), S3**

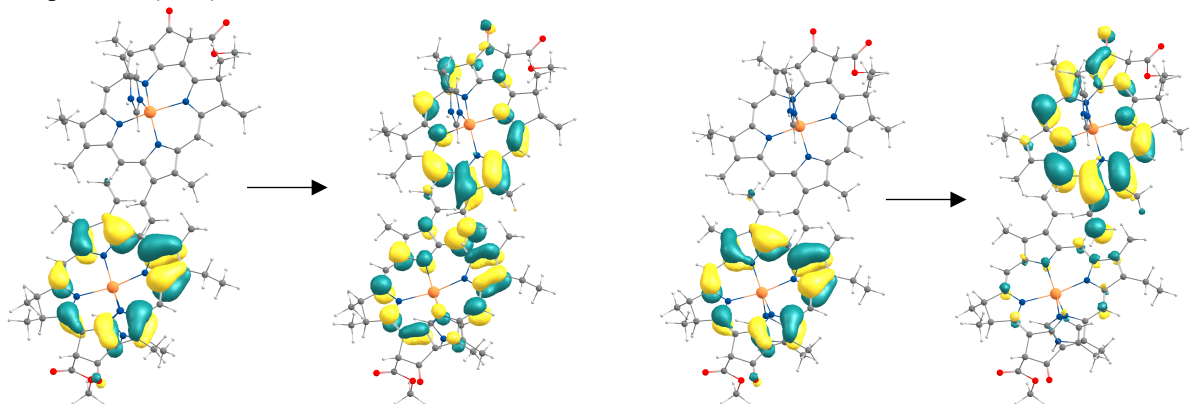

**Figure S5 (continued).** Natural Transition Orbitals (NTOs) for the lowest excited state with significant CT character for the C2-C10 dimer in snapshots 2-10.

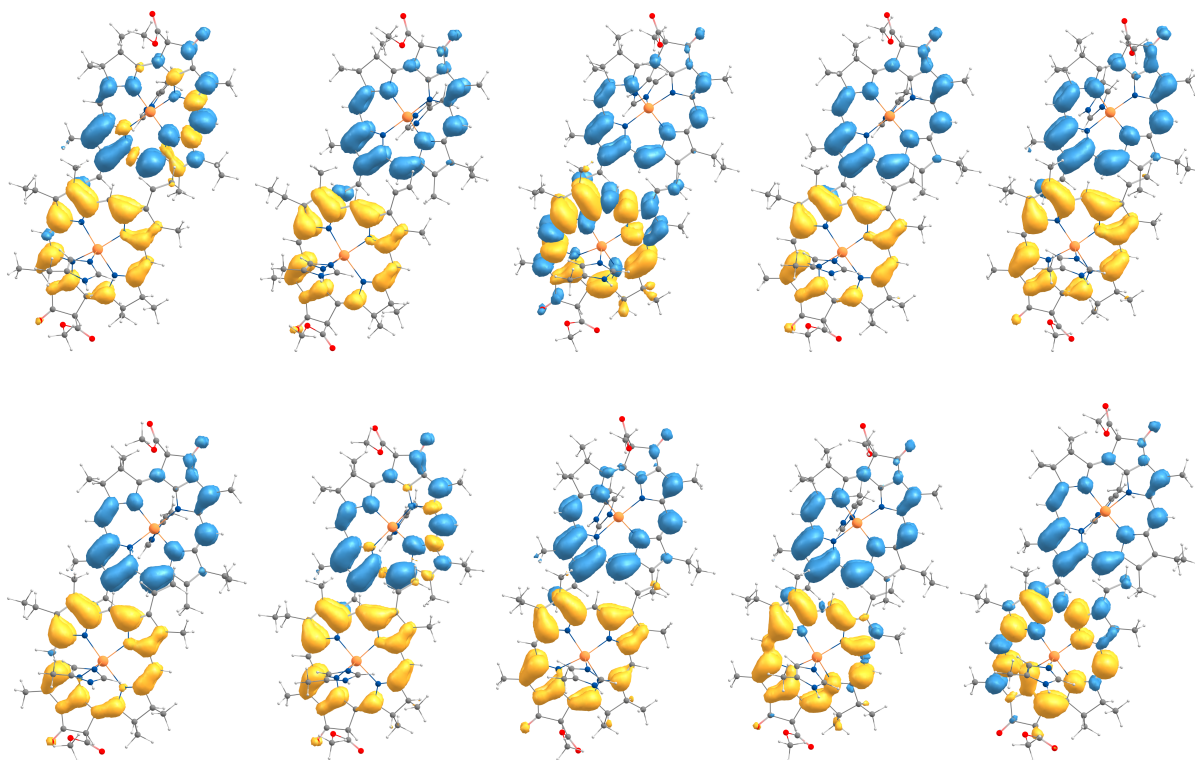

**Figure S6.** TD-DFT difference densities for the lowest excited states with CT character for the C2-C10 dimer in the ‘crystal-like’ (snapshot 1) and snapshots 2-10.

**Table S8.** Comparison of different range-separated functionals to compute the Chl a ionization potential (IP) and electron affinity (EA), the energy of the Highest Occupied Molecular Orbital (HOMO) for Chl and Chl<sup>-</sup>.<sup>27</sup> All energy values are in eV. HFX is the range of exact (Hartree–Fock) exchange included in each functional, and  $\omega$  (in Bohr<sup>-1</sup>) is the parameter controlling the range separation.

| DFT Method                    | HFX       | $\omega$ | HOMO (Chl) | IP (Chl <sup>+</sup> /Chl) | HOMO (Chl <sup>-</sup> ) | EA (Chl/Chl <sup>-</sup> ) | CT state energy |
|-------------------------------|-----------|----------|------------|----------------------------|--------------------------|----------------------------|-----------------|
| CAM-B3LYP <sup>28</sup>       | 19–65%    | 0.33     | -6.1184    | 6.2733                     | -1.7153                  | 1.9350                     | 1.302           |
| LC-BLYP <sup>29</sup>         | 0–100%    | 0.33     | -6.8345    | 6.2740                     | -2.5112                  | 2.0611                     | 1.930           |
| $\omega$ B97 <sup>30</sup>    | 0–100%    | 0.40     | -6.8535    | 6.0935                     | -2.5049                  | 2.0602                     | 2.104           |
| $\omega$ B97X-V <sup>31</sup> | 16.7–100% | 0.30     | -6.7753    | 6.2733                     | -2.6160                  | 1.9738                     | 1.943           |
| $\omega$ B2PLYP <sup>32</sup> | 53–100%   | 0.30     | -6.5902    | 6.5702                     | -2.4626                  | 1.7388                     | --              |
| LC-PBE <sup>33</sup>          | 0–100%    | 0.47     | -7.1880    | 6.3005                     | -3.0015                  | 2.3925                     | 1.958           |

## Example ORCA input file for the QM/MM TD-DFT calculations conducted in the present work

```
! QMMM NoTrah
! wB97X-D3BJ RIJCOSX verytightSCF

%tddft
  TDA false
  nroots 8
  maxdim 20
  donto true
  NT0Thresh 1e-4
end

%pal nprocs 8 end
%maxcore 16000

%basis
  Basis "Def2-TZVP"
  AuxJ "Def2/J"
  AuxC "Def2-TZVP/C"
  AuxJK "Def2/JK"
end

%qmmm
  ORCAFFfilename "ps2-A1-final.ORCAFF.prms"
  Embedding Electrostatic
  ChargeAlteration CS
  QMAatoms end
end

*pdbfile 0 1 chl-opt.pdb
```

**Note:** complete ORCA output files of all TD-DFT calculations are provided in a separate supporting data set hosted by the Open Research Data Repository of the Max Planck Society at: <https://doi.org/10.17617/3.S2DPUE>

## Cartesian coordinates (in Å) of QM regions from the QM/MM geometry optimizations of the 13 CP43 chlorophylls and of Chl<sub>ZD1</sub>

**Note:** These coordinates are also provided as a separate plain-text file.

**Note:** PDB files that contain the optimized QM structures within the complete MM setup of the PSII monomer, as well as complete force field parameter files to enable reproduction of the complete simulations, are provided in a separate supporting data set, hosted by the Open Research Data Repository of the Max Planck Society at: <https://doi.org/10.17617/3.S2DPUE>

To facilitate use of these PDB files, the list below indicates the correspondence between the Chl labels used in this work and the residue numbers in the PDB files.

| Site               | Chl in PDB | Ligand in PDB |
|--------------------|------------|---------------|
| C1                 | 1146       | H563          |
| C2                 | 1147       | H756          |
| C3                 | 1148       | H444          |
| C4                 | 2736       |               |
| C5                 | 1149       | H767          |
| C6                 | 1150       | H577          |
| C7                 | 2737       |               |
| C8                 | 1151       | H770          |
| C9                 | 1152       | H379          |
| C10                | 1153       | H382          |
| C11                | 2738       | N365          |
| C12                | 1154       | H490          |
| C13                | 1155       | H458          |
| Chl <sub>ZD1</sub> | 1145       | H118          |

**C1**  
88

|   |                  |                 |                 |
|---|------------------|-----------------|-----------------|
| C | 109.942118107884 | 63.430277071805 | 84.822841610029 |
| H | 110.322679352993 | 63.116007714856 | 85.804607033856 |
| H | 110.804500421759 | 63.627637971882 | 84.172264450002 |
| C | 109.101613289299 | 64.661100257664 | 84.890923304930 |
| N | 108.250592035459 | 64.958301115770 | 85.939133238347 |
| H | 108.073006836008 | 64.357949026038 | 86.748335579086 |
| C | 107.634384261784 | 66.136312757261 | 85.677126360575 |
| H | 106.931717627102 | 66.619112486604 | 86.348183605036 |
| N | 108.034263990189 | 66.611440268213 | 84.507586647159 |
| C | 108.950608015071 | 65.708943093134 | 84.009156337919 |
| H | 109.444867511205 | 65.882903568564 | 83.058714690414 |
| C | 105.347785579216 | 72.189962612159 | 86.868265664590 |
| C | 103.733718163019 | 65.817335356744 | 80.216258965993 |
| C | 111.308839955818 | 68.698235780702 | 79.332540123928 |
| C | 110.292131579939 | 71.451380096640 | 86.889078934188 |
| N | 106.295464378594 | 69.379503129451 | 85.136102569923 |
| C | 104.022687090885 | 65.866345641133 | 78.900884518309 |
| C | 111.161269572482 | 70.143228894689 | 78.837531947464 |
| C | 108.793026019970 | 71.267102581316 | 87.390381634199 |



|    |                  |                 |                 |
|----|------------------|-----------------|-----------------|
| N  | 105.706267861219 | 67.858564116940 | 82.627807203343 |
| O  | 111.143644262299 | 72.102576682389 | 87.474145483635 |
| C  | 108.823929640112 | 70.451266203735 | 88.679818728651 |
| N  | 109.096204941100 | 69.520082792793 | 84.166025411821 |
| C  | 109.417716838471 | 70.557997018899 | 90.980244798628 |
| C  | 108.100838096093 | 70.515960790211 | 86.263749417908 |
| C  | 104.189542310911 | 68.301180287148 | 84.515857558075 |
| C  | 106.678729088412 | 67.103593682265 | 80.511397939647 |
| C  | 110.691168098837 | 69.186622580913 | 82.361439645729 |
| C  | 104.233148246463 | 68.614106395636 | 87.675746856187 |
| C  | 102.249491435827 | 66.442519363344 | 82.870353190403 |
| C  | 108.755627213884 | 67.118098628373 | 78.178270684389 |
| C  | 112.640148222905 | 70.808821812397 | 84.345432392646 |
| C  | 106.755967133968 | 70.197114253492 | 86.135174169240 |
| C  | 104.512321207117 | 67.710584638169 | 83.276667946663 |
| C  | 107.991821541485 | 67.598299202693 | 80.635000914229 |
| C  | 110.378174396038 | 69.642536292142 | 83.648780380073 |
| O  | 108.589101563829 | 69.256449223241 | 88.740097714047 |
| C  | 105.622682083308 | 70.680145375268 | 87.020193814580 |
| C  | 103.623470833292 | 66.885403132014 | 82.483441415897 |
| C  | 108.972497173789 | 67.621066498467 | 79.566926360526 |
| C  | 111.228936986821 | 70.382946508984 | 84.575249122971 |
| O  | 109.184116643763 | 71.225515011409 | 89.718145159365 |
| C  | 104.473607205384 | 69.714274589920 | 86.632879262690 |
| C  | 104.296713168305 | 66.595474333931 | 81.300604630375 |
| C  | 110.094903706703 | 68.245133229688 | 80.076813041149 |
| C  | 110.390228775243 | 70.704076847663 | 85.643635247253 |
| C  | 104.978793047490 | 69.108243365295 | 85.331797676717 |
| C  | 105.622429403659 | 67.203704363600 | 81.422980661596 |
| C  | 109.801563585587 | 68.565181255403 | 81.463841962917 |
| C  | 109.102472896176 | 70.168664653417 | 85.335030246205 |
| N  | 108.516371449011 | 68.171196840295 | 81.762227207103 |
| Mg | 107.466715523073 | 68.436950725918 | 83.559843386837 |
| H  | 106.260662094161 | 72.747491247714 | 87.108062612362 |
| H  | 104.578196292601 | 72.519744502759 | 87.578772241207 |
| H  | 102.946738707870 | 65.116177668923 | 80.522659929958 |
| H  | 111.507875051838 | 68.025399001892 | 78.485351820530 |
| H  | 112.184189746108 | 68.661572789765 | 79.998810123747 |
| H  | 104.748033736692 | 66.568615655774 | 78.491573642369 |
| H  | 103.521598687603 | 65.200573830688 | 78.198380705427 |
| H  | 111.030952694655 | 70.803549999722 | 79.704034144403 |
| H  | 110.276675501309 | 70.258355576228 | 78.195969657190 |
| H  | 112.049275960258 | 70.475335951168 | 78.277439327391 |
| H  | 108.391217816758 | 72.266859080293 | 87.614080280230 |
| H  | 110.500757393525 | 70.439410784982 | 91.114847825893 |
| H  | 108.922752406407 | 69.580713959110 | 90.996802042183 |
| H  | 109.026285192080 | 71.216569146599 | 91.760984056157 |
| H  | 103.172289580094 | 68.132585810947 | 84.874480697068 |
| H  | 106.461486715780 | 66.587066169244 | 79.577899600782 |
| H  | 111.705888982572 | 69.370901063886 | 82.003092684536 |
| H  | 103.829625273773 | 69.036087606376 | 88.605164886372 |
| H  | 105.169734257727 | 68.086261118070 | 87.911397131907 |
| H  | 103.505379951294 | 67.879765389362 | 87.304702915456 |
| H  | 102.119153677149 | 66.438742807903 | 83.960631582615 |
| H  | 102.042085779085 | 65.422085212626 | 82.514631177958 |
| H  | 101.462208172697 | 67.084382072425 | 82.441962881486 |
| H  | 109.717791462217 | 66.976632735348 | 77.669716044930 |
| H  | 108.147717799763 | 67.816390610855 | 77.577921295814 |

|   |                  |                 |                 |
|---|------------------|-----------------|-----------------|
| H | 108.230733860005 | 66.150238842843 | 78.172502672158 |
| H | 113.224957273718 | 70.045279921901 | 83.811755630332 |
| H | 113.137628781757 | 71.039550307505 | 85.296196034917 |
| H | 112.664685047832 | 71.727808709819 | 83.735998244179 |
| H | 105.904374075608 | 70.522890104011 | 88.073427243833 |
| H | 103.524518732935 | 70.249027269323 | 86.483927779333 |
| O | 111.134884149960 | 74.175737939602 | 89.542747143064 |
| H | 111.984206170065 | 74.654646201668 | 89.485901327557 |
| H | 111.132019455426 | 73.549341469669 | 88.791083786571 |
| H | 109.353647105734 | 62.592315497268 | 84.397766716665 |
| H | 105.044292548816 | 72.563432777818 | 85.862592706228 |

## C2

101

|   |                  |                 |                 |
|---|------------------|-----------------|-----------------|
| C | 104.198845310509 | 76.223534278193 | 92.770829455742 |
| H | 103.270897577928 | 75.822743362857 | 93.199356512176 |
| H | 104.283925482458 | 77.278827620695 | 93.066655190295 |
| C | 104.151677147447 | 76.078199913746 | 91.271178653396 |
| C | 104.929129848303 | 76.874623952010 | 90.419196528843 |
| H | 105.591191431235 | 77.627526796479 | 90.847812018336 |
| C | 104.855069531952 | 76.748894270171 | 89.031468556578 |
| H | 105.464931258332 | 77.386383496160 | 88.386825199218 |
| C | 103.993284464617 | 75.800506255114 | 88.459631339715 |
| O | 103.860714871392 | 75.635114991498 | 87.106372490455 |
| H | 104.714359019004 | 75.869118207760 | 86.676293991394 |
| C | 103.206319006636 | 74.999914609977 | 89.294765880370 |
| H | 102.562340260859 | 74.251539309387 | 88.833515142770 |
| C | 103.285072653223 | 75.147615443075 | 90.678635555311 |
| H | 102.654920054835 | 74.528055329416 | 91.320701434815 |
| C | 99.764159298549  | 81.172105365391 | 82.673045782781 |
| H | 99.413426276764  | 81.146353993573 | 83.711017774299 |
| H | 99.469191939096  | 80.238572613223 | 82.177436575913 |
| C | 101.238873336170 | 81.377196727407 | 82.524221462910 |
| N | 102.000302787158 | 82.156296468401 | 83.373639671780 |
| H | 101.631750308683 | 82.598684309964 | 84.219584889718 |
| C | 103.224125955700 | 82.336531718586 | 82.817704329114 |
| H | 104.020121383308 | 82.908878609322 | 83.282126038355 |
| N | 103.298605190111 | 81.702813255117 | 81.651830553106 |
| C | 102.068918899790 | 81.100254725628 | 81.462304988033 |
| H | 101.862904408535 | 80.503735176036 | 80.579076675816 |
| C | 108.681254409124 | 78.892345577814 | 83.690329038377 |
| C | 106.127560398117 | 85.803599439210 | 77.518501102113 |
| C | 101.414815465675 | 79.555155110525 | 75.981659465428 |
| C | 104.430961683970 | 76.633606936166 | 83.039843650114 |
| N | 106.410348054554 | 80.874281061551 | 81.864416377175 |
| C | 106.813518837207 | 86.955945133920 | 77.380878730208 |
| C | 99.981326929289  | 80.043322535884 | 76.248424647387 |
| C | 105.357520331519 | 77.687957620127 | 83.760286406594 |
| N | 105.916806560523 | 82.759364885909 | 79.600619905367 |
| O | 104.131504124868 | 75.543894491726 | 83.500261079783 |
| C | 104.720359164240 | 78.336546985177 | 84.986984118757 |
| N | 104.364677193919 | 79.160693250034 | 80.538401874323 |
| C | 102.666001583012 | 78.940781487036 | 85.990616814419 |
| C | 105.567008026770 | 78.797107312115 | 82.731695119055 |
| C | 107.480106545979 | 83.034881747291 | 81.488198600002 |
| C | 104.682076913594 | 83.086772291976 | 77.503934022036 |
| C | 102.916295764225 | 78.692522517102 | 78.637593503640 |

|    |                  |                 |                 |
|----|------------------|-----------------|-----------------|
| C  | 108.028511754229 | 82.432158265103 | 84.531514047537 |
| C  | 107.867191476582 | 85.878569246850 | 80.266471284547 |
| C  | 102.604673805306 | 82.417773738813 | 75.248290183522 |
| C  | 102.607880683244 | 75.867429110933 | 80.094838491846 |
| C  | 106.468800680362 | 79.853557680100 | 82.773782661709 |
| C  | 106.820774155478 | 83.490978364674 | 80.326849097306 |
| C  | 103.919754999681 | 81.904823321746 | 77.456815550760 |
| C  | 103.515127008070 | 78.312770036689 | 79.846117827234 |
| O  | 105.344745152210 | 78.900225081064 | 85.865575396400 |
| C  | 107.629541798353 | 80.021719984797 | 83.739498561057 |
| C  | 107.037608354204 | 84.779437753028 | 79.698039721286 |
| C  | 102.970117338918 | 81.563044447012 | 76.414865415704 |
| C  | 103.333543539074 | 77.071589714638 | 80.583309072126 |
| O  | 103.374776679622 | 78.283945639759 | 84.920999615299 |
| C  | 108.165757811464 | 81.433531223651 | 83.379345203484 |
| C  | 106.275886126961 | 84.783092153637 | 78.531951981572 |
| C  | 102.460934599649 | 80.320341937840 | 76.734823823753 |
| C  | 104.046607328913 | 77.245958858873 | 81.767257909726 |
| C  | 107.336170588496 | 81.820992841787 | 82.160727010299 |
| C  | 105.573989772696 | 83.501406638319 | 78.496909218958 |
| C  | 103.108908671542 | 79.916923048541 | 77.973541050933 |
| C  | 104.673407068801 | 78.525508536622 | 81.674531414136 |
| N  | 103.966625132523 | 80.910606648571 | 78.395609838926 |
| Mg | 104.890960376983 | 81.118604886675 | 80.305283518789 |
| H  | 108.288456021201 | 77.982597538835 | 84.160353644029 |
| H  | 109.572055365405 | 79.182956054588 | 84.260662945155 |
| H  | 105.360963182963 | 85.597978132860 | 76.764015390105 |
| H  | 101.480397677508 | 78.484350485721 | 76.229168821684 |
| H  | 101.615538277399 | 79.637261671159 | 74.898748821990 |
| H  | 107.605565532275 | 87.250466990561 | 78.063611414791 |
| H  | 106.596773249544 | 87.627262601133 | 76.553616720324 |
| H  | 99.243078440428  | 79.407403322319 | 75.738408762542 |
| H  | 99.845572588866  | 81.072343249274 | 75.888156738916 |
| H  | 99.758176615427  | 80.026060497410 | 77.324800535688 |
| H  | 106.280997208749 | 77.208762674154 | 84.101407416370 |
| H  | 101.689404054729 | 78.453540315241 | 86.051054091385 |
| H  | 102.552491893080 | 80.006727054142 | 85.742258048302 |
| H  | 103.214433710061 | 78.831644506711 | 86.933238842498 |
| H  | 108.210655991824 | 83.724792184780 | 81.912668647218 |
| H  | 104.540185680698 | 83.770157423893 | 76.664977305028 |
| H  | 102.228365711174 | 77.982413064320 | 78.174417101426 |
| H  | 106.972900039782 | 82.537494244899 | 84.817758033458 |
| H  | 108.403862643936 | 83.426577978837 | 84.254551751001 |
| H  | 108.592918680393 | 82.089020884008 | 85.409748620638 |
| H  | 107.414763846899 | 86.856919028357 | 80.057827526768 |
| H  | 108.889040956746 | 85.902358584900 | 79.855653586231 |
| H  | 107.962780522893 | 85.786827583689 | 81.353771408584 |
| H  | 103.492064485845 | 82.795113858600 | 74.721555574797 |
| H  | 102.030478890700 | 83.304590444275 | 75.554560749578 |
| H  | 101.980149898926 | 81.865497804670 | 74.534274662825 |
| H  | 101.629292878270 | 75.749456091111 | 80.580294766120 |
| H  | 103.187159605010 | 74.961045031080 | 80.318575080227 |
| H  | 102.449784942086 | 75.921187120577 | 79.008466166909 |
| H  | 107.232453556377 | 80.018913213212 | 84.767073777947 |
| H  | 109.230856532604 | 81.374991507337 | 83.099758236467 |
| H  | 105.039726044601 | 75.660785399070 | 93.265297733037 |
| H  | 99.288278876883  | 82.026215142491 | 82.147707598774 |
| H  | 109.003699772400 | 78.623900779050 | 82.657104603431 |

## C3

85

|    |                  |                 |                 |
|----|------------------|-----------------|-----------------|
| C  | 119.794613278974 | 81.921605780046 | 80.369494600604 |
| H  | 119.969225917318 | 82.507915785777 | 81.281988905288 |
| H  | 119.113045803101 | 82.488599363291 | 79.726643198077 |
| C  | 119.172943803651 | 80.604030554297 | 80.681791631654 |
| N  | 119.429827155271 | 79.908144495743 | 81.847109087393 |
| H  | 119.987339839827 | 80.281949648315 | 82.621609851784 |
| C  | 118.719762424703 | 78.752627837949 | 81.824976261967 |
| H  | 118.724713812814 | 78.015181239948 | 82.621007572686 |
| N  | 118.025397228004 | 78.657980601955 | 80.697041416870 |
| C  | 118.292837539379 | 79.806225979800 | 79.981614129528 |
| H  | 117.815438300916 | 79.984797871017 | 79.023904674269 |
| C  | 114.472694018687 | 76.109078351616 | 85.276574598668 |
| C  | 120.296750760383 | 73.290251969132 | 78.026002657608 |
| C  | 114.639843086285 | 77.900960209881 | 74.826024682234 |
| C  | 112.787766069530 | 79.684608393874 | 82.568698208363 |
| N  | 116.397214497171 | 76.490699700570 | 82.256125139549 |
| C  | 120.963038205554 | 72.119669512245 | 78.104447979392 |
| C  | 113.406621778246 | 77.010849808510 | 74.616556449458 |
| C  | 113.583848590985 | 78.771672915336 | 83.586539565508 |
| N  | 117.964040829393 | 75.430735798578 | 79.936469576813 |
| O  | 111.961262334845 | 80.518607833565 | 82.890189756145 |
| C  | 114.281358509202 | 79.640118215840 | 84.611263803243 |
| N  | 114.913510053727 | 78.069959915202 | 80.221012388025 |
| C  | 115.911182494790 | 81.322427782957 | 84.842370625484 |
| C  | 114.567324122254 | 77.992264481578 | 82.723017843725 |
| C  | 118.219265003452 | 74.862482703652 | 82.324432173962 |
| C  | 118.129494245160 | 75.415694003230 | 77.484416390313 |
| C  | 114.424688264714 | 78.553316923184 | 77.891551874302 |
| C  | 118.060014271977 | 75.802504158215 | 85.325328710040 |
| C  | 120.335570269135 | 72.836514583442 | 81.216237759046 |
| C  | 117.113542287319 | 75.869785002454 | 74.564092465565 |
| C  | 112.157790106446 | 80.463715013876 | 79.239006889822 |
| C  | 115.518575554049 | 77.069494182984 | 83.129773085215 |
| C  | 118.540127057729 | 74.719986667053 | 80.955617674273 |
| C  | 117.102675284044 | 76.312202834039 | 77.144680296782 |
| C  | 114.183041402398 | 78.749591263316 | 79.254378667430 |
| O  | 114.035193896786 | 79.691514097743 | 85.795854610227 |
| C  | 115.732227507370 | 76.588650639171 | 84.549292531841 |
| C  | 119.496942407190 | 73.775273477421 | 80.421520356023 |
| C  | 116.602537304610 | 76.535298083221 | 75.801360124525 |
| C  | 113.151209511069 | 79.569563924767 | 79.887386117365 |
| O  | 115.242841835273 | 80.374909622747 | 83.992267574066 |
| C  | 116.872993101185 | 75.551285642125 | 84.396335357944 |
| C  | 119.495654177552 | 73.945256800484 | 79.038818222920 |
| C  | 115.541512217643 | 77.411914223568 | 75.916714906666 |
| C  | 113.293147587956 | 79.330633966893 | 81.244589642633 |
| C  | 117.214843049596 | 75.627587053074 | 82.912977286764 |
| C  | 118.517178545294 | 74.990560507782 | 78.758519548084 |
| C  | 115.411633006979 | 77.719138744315 | 77.332827357880 |
| C  | 114.357901185163 | 78.396868677219 | 81.393643383808 |
| N  | 116.378657801921 | 77.046617359842 | 78.047174853239 |
| Mg | 116.677856259835 | 77.038424984074 | 80.148594261419 |
| H  | 113.820114301984 | 76.958102003977 | 85.511514840590 |
| H  | 114.745540922241 | 75.672277115646 | 86.242984366158 |

|   |                  |                 |                 |
|---|------------------|-----------------|-----------------|
| H | 120.364902769382 | 73.829852459197 | 77.074539834761 |
| H | 115.207567588805 | 77.966594383266 | 73.882102497811 |
| H | 114.306177517013 | 78.927442919605 | 75.047994492977 |
| H | 120.932784509845 | 71.479059024256 | 78.984819852998 |
| H | 121.547961688902 | 71.761696142076 | 77.256179941248 |
| H | 112.805762675060 | 76.963927129138 | 75.535737114273 |
| H | 113.696963961120 | 75.981763826067 | 74.359916282088 |
| H | 112.769090238501 | 77.404069186176 | 73.810140389745 |
| H | 112.852718150518 | 78.147819498233 | 84.114683200049 |
| H | 116.739090025094 | 81.724492138039 | 84.250465180875 |
| H | 116.268986531471 | 80.844870580310 | 85.761084844057 |
| H | 115.222290846204 | 82.126687875794 | 85.117672889902 |
| H | 118.772308037857 | 74.215600145608 | 83.007679145814 |
| H | 118.637646103478 | 74.940151480838 | 76.643966347294 |
| H | 113.740999691606 | 79.032753013142 | 77.192106173871 |
| H | 118.862489076794 | 75.067060170319 | 85.169856649031 |
| H | 117.747135060029 | 75.751055379858 | 86.378220426602 |
| H | 118.484167411246 | 76.801676505998 | 85.152395241075 |
| H | 119.888964219760 | 71.829858762951 | 81.262989022761 |
| H | 120.477936811889 | 73.186154624736 | 82.246792626542 |
| H | 121.324054883765 | 72.718904446290 | 80.753440230649 |
| H | 118.209046012443 | 75.948651916693 | 74.481405617110 |
| H | 116.671634902403 | 76.316763998939 | 73.661428159143 |
| H | 116.868814504965 | 74.794110187088 | 74.552060902932 |
| H | 111.354381127977 | 80.709794344073 | 79.943746678386 |
| H | 111.719739068524 | 79.995876600633 | 78.349101407381 |
| H | 112.614621454619 | 81.412388789394 | 78.915566245589 |
| H | 116.111018009299 | 77.444551054602 | 85.139962438321 |
| H | 116.480077709801 | 74.544091364981 | 84.611467978649 |
| H | 120.771595575442 | 81.812642123795 | 79.842797571149 |
| H | 113.851126814752 | 75.363340710643 | 84.719223547387 |

#### C4

79

|   |                  |                 |                 |
|---|------------------|-----------------|-----------------|
| C | 105.756642623608 | 93.136686466482 | 89.002104118072 |
| C | 105.032738394562 | 87.310355142269 | 82.030119474129 |
| C | 110.446090520111 | 92.969861586980 | 80.264883228285 |
| C | 110.401280922850 | 94.546143863956 | 88.131550415046 |
| N | 107.359332207012 | 90.991751401528 | 86.970673001271 |
| C | 104.212991453281 | 86.240777483489 | 81.962530713726 |
| C | 109.606881866205 | 94.243061082010 | 80.093878014860 |
| C | 109.281743715962 | 93.724176512802 | 88.891744546697 |
| N | 106.766957307214 | 89.547705158175 | 84.418353144030 |
| O | 110.971762136773 | 95.509336768823 | 88.625821705373 |
| C | 109.911230735288 | 93.114080662289 | 90.133912525385 |
| N | 109.536924925885 | 92.323363714453 | 85.501174497723 |
| C | 111.563728319475 | 91.551713769060 | 90.859285247655 |
| C | 108.778379539792 | 92.718743317844 | 87.871196469059 |
| C | 105.674259560600 | 89.261468011718 | 86.596074857594 |
| C | 107.269281507216 | 89.481605234096 | 82.031521917863 |
| C | 110.544138467079 | 92.860255652307 | 83.359909327503 |
| C | 106.247730464842 | 89.402088003306 | 89.716996382604 |
| C | 104.141147253256 | 86.983923123581 | 85.125528468139 |
| C | 108.462296326216 | 90.649591546940 | 79.343297182146 |
| C | 112.191018031946 | 94.983664149900 | 85.111239539705 |
| C | 107.685051077330 | 91.875805164710 | 87.965501082403 |
| C | 105.882085353585 | 88.921649060701 | 85.248908246212 |

|    |                  |                 |                 |
|----|------------------|-----------------|-----------------|
| C  | 108.297164926348 | 90.444514166955 | 81.969622995857 |
| C  | 110.451918656164 | 93.041976496548 | 84.741507213935 |
| O  | 109.635953566032 | 93.439046017466 | 91.275306792207 |
| C  | 106.639896292837 | 91.872707822843 | 89.060441342990 |
| C  | 105.125554433692 | 87.922855207602 | 84.520054684234 |
| C  | 108.836744127672 | 91.010060217375 | 80.746068411250 |
| C  | 111.124857565004 | 94.043287881906 | 85.556641848910 |
| O  | 110.842645882224 | 92.205978067349 | 89.785684705059 |
| C  | 105.879753599353 | 90.556581002133 | 88.780422262528 |
| C  | 105.518379508412 | 88.022477334689 | 83.191695471308 |
| C  | 109.753106780020 | 91.973909732209 | 81.134425962137 |
| C  | 110.532129084722 | 93.928641180596 | 86.816539988871 |
| C  | 106.297174140529 | 90.243539336022 | 87.357489276402 |
| C  | 106.568122750294 | 89.047964975976 | 83.156549806323 |
| C  | 109.774570107003 | 91.976484682948 | 82.582325204373 |
| C  | 109.573928862868 | 92.871412046238 | 86.720306715436 |
| N  | 108.889950149805 | 91.032649148495 | 83.059399982090 |
| Mg | 108.384092173632 | 90.659226237799 | 85.089365428323 |
| H  | 106.358655215085 | 94.028791951921 | 89.220222850720 |
| H  | 104.969699712689 | 93.068039326028 | 89.763427951732 |
| H  | 105.383845532244 | 87.705557687429 | 81.074351088387 |
| H  | 110.668959413307 | 92.529302984002 | 79.279978655535 |
| H  | 111.415316835878 | 93.238003663319 | 80.708505153296 |
| H  | 103.795077896888 | 85.756505809101 | 82.842575854260 |
| H  | 103.964530458460 | 85.802159477958 | 80.995506866143 |
| H  | 110.099175500997 | 94.983073142549 | 79.443392696715 |
| H  | 109.430378341621 | 94.720629353203 | 81.066932186372 |
| H  | 108.626659946064 | 93.999202313167 | 79.660869866513 |
| H  | 108.514742051964 | 94.432567694612 | 89.232313603822 |
| H  | 110.980423296155 | 91.573328496989 | 91.782588043550 |
| H  | 112.521226802968 | 92.070487630588 | 91.007153390444 |
| H  | 111.729783390352 | 90.523099593978 | 90.526094579668 |
| H  | 104.881927772093 | 88.720070923448 | 87.107964600840 |
| H  | 106.962469310172 | 89.060542851205 | 81.075745822341 |
| H  | 111.226558175924 | 93.519092843710 | 82.820455003489 |
| H  | 105.635294022755 | 88.516087604263 | 89.500709785512 |
| H  | 106.072792091491 | 89.687215146024 | 90.763204475995 |
| H  | 107.298131914995 | 89.117906817468 | 89.589374758312 |
| H  | 103.113386550943 | 87.195901108660 | 84.796721472851 |
| H  | 104.158886473542 | 87.035766667172 | 86.219584450650 |
| H  | 104.359975999764 | 85.942198305005 | 84.848528165723 |
| H  | 107.780686213334 | 91.388985182759 | 78.890383189169 |
| H  | 107.966622806713 | 89.670859028342 | 79.292482820703 |
| H  | 109.353423680766 | 90.599762740812 | 78.697994213641 |
| H  | 112.081500863974 | 95.254099634518 | 84.049995507823 |
| H  | 113.187599341067 | 94.532626830386 | 85.240716031206 |
| H  | 112.187480110778 | 95.900598009615 | 85.714638033286 |
| H  | 107.103244304700 | 91.855455313295 | 90.059414938788 |
| H  | 104.798916663091 | 90.722326557531 | 88.832411064412 |
| O  | 110.179471427260 | 88.754603444615 | 88.305162201042 |
| H  | 110.768474447020 | 87.978263993818 | 88.473901474486 |
| H  | 109.807934670404 | 88.996012413517 | 89.179517159771 |
| O  | 109.622026674785 | 89.162081946888 | 85.796719297116 |
| H  | 110.536245518252 | 89.353201916026 | 85.517640553437 |
| H  | 109.707781830184 | 88.998071519603 | 86.796301302187 |
| H  | 105.267754421447 | 93.327668960521 | 88.010035157977 |

## C5

107

|   |                 |                 |                 |
|---|-----------------|-----------------|-----------------|
| C | 93.664723004181 | 77.445708584619 | 68.771129618652 |
| H | 94.562035987394 | 77.354401301562 | 69.399057523949 |
| H | 92.891512377411 | 77.931916981211 | 69.373923133766 |
| C | 93.157705556926 | 76.129538252837 | 68.277199472904 |
| N | 93.968174550165 | 75.232250820491 | 67.610348092242 |
| H | 94.972185671315 | 75.328426649480 | 67.449604981416 |
| C | 93.220168731344 | 74.188776631993 | 67.188956243034 |
| H | 93.614851340503 | 73.334044632081 | 66.649510662244 |
| N | 91.954712376309 | 74.354834347609 | 67.551962999850 |
| C | 91.901549025011 | 75.558721879307 | 68.231142399484 |
| H | 90.971307800873 | 75.932793395525 | 68.646965012988 |
| C | 89.577843073264 | 74.740770148144 | 57.599058325545 |
| H | 89.592934051522 | 75.671277543082 | 58.182789990532 |
| H | 88.629316704016 | 74.735994275060 | 57.047422528235 |
| C | 89.631984449127 | 73.535708181135 | 58.540771258101 |
| H | 90.650248870440 | 73.357665205794 | 58.913967706524 |
| H | 89.015150450786 | 73.738859104191 | 59.430092507748 |
| C | 89.102866964231 | 72.272606839146 | 57.860436434394 |
| H | 88.045209964310 | 72.430171010970 | 57.608007811137 |
| H | 89.607464984116 | 72.115932681628 | 56.894893984114 |
| N | 89.248091746365 | 71.102402849403 | 58.713101789145 |
| H | 90.079441774166 | 71.077313278024 | 59.322758690262 |
| C | 88.318856034717 | 70.168627705487 | 58.952759462008 |
| N | 87.162646233867 | 70.156353705156 | 58.260569968721 |
| H | 86.948444713131 | 70.943798081605 | 57.660963925240 |
| H | 86.356717004702 | 69.603540703242 | 58.583830063871 |
| N | 88.582452786861 | 69.245501275475 | 59.885345018891 |
| H | 89.585216180518 | 69.098572612825 | 60.147217265137 |
| H | 87.975859414160 | 68.443567402051 | 60.045411950584 |
| C | 87.964079136543 | 71.893444352611 | 62.638862656350 |
| C | 87.349391815779 | 74.565535165603 | 71.611644097905 |
| C | 93.849008017419 | 69.882594042857 | 71.262708889917 |
| C | 92.167317356909 | 69.765214270588 | 63.266447488414 |
| N | 89.516538207635 | 73.007545546652 | 65.580740637760 |
| C | 86.252120525291 | 75.209781548685 | 72.060698429175 |
| C | 95.059199040603 | 70.747093412815 | 71.644657480786 |
| C | 91.103670583048 | 70.858388002632 | 62.831803951508 |
| N | 89.020915438792 | 73.452500581666 | 68.500625355786 |
| O | 92.544645058672 | 68.880608105123 | 62.485471806589 |
| C | 91.637959909119 | 71.701234374168 | 61.696430243479 |
| N | 91.755634736534 | 71.289355091153 | 66.418020840387 |
| C | 93.251034770063 | 73.282032295262 | 61.042507340115 |
| C | 90.793225364602 | 71.599907539569 | 64.113139254406 |
| C | 87.700088590760 | 74.290624683259 | 66.607827676342 |
| C | 89.840318904503 | 72.916415090574 | 70.749395148831 |
| C | 93.038587283362 | 70.249859067257 | 68.227717997360 |
| C | 88.230497416304 | 75.496236356766 | 63.629184855336 |
| C | 85.722357711863 | 75.168206472681 | 68.864504513172 |
| C | 91.707795797550 | 71.556655331717 | 72.903702132430 |
| C | 94.277469807816 | 68.552238752075 | 65.842367572482 |
| C | 89.795470086505 | 72.519096520079 | 64.331677116742 |
| C | 87.930928471275 | 74.091126783456 | 67.985622459624 |
| C | 90.928894785888 | 72.068731712445 | 70.441005874925 |
| C | 92.715193881079 | 70.376605891752 | 66.864472804438 |
| O | 91.366797310271 | 71.537620311798 | 60.512937899053 |
| C | 88.808051346349 | 73.001262481488 | 63.290565559921 |

|    |                 |                 |                 |
|----|-----------------|-----------------|-----------------|
| C  | 87.070936869971 | 74.560378736399 | 69.056451455718 |
| C  | 91.793160466095 | 71.418971841735 | 71.422489121533 |
| C  | 93.212915190441 | 69.583682615939 | 65.766846293182 |
| O  | 92.507155359218 | 72.638468314428 | 62.104218609924 |
| C  | 87.998411901644 | 74.054271444572 | 64.086718702001 |
| C  | 87.721277558320 | 74.257677780856 | 70.247448709026 |
| C  | 92.708807256444 | 70.678442679984 | 70.708729720111 |
| C  | 92.478974708354 | 70.015182828725 | 64.645649984027 |
| C  | 88.425758950983 | 73.806645420365 | 65.523862596245 |
| C  | 88.936169108351 | 73.520842126745 | 69.871125709879 |
| C  | 92.386923615427 | 70.871457222286 | 69.299022220163 |
| C  | 91.629929278429 | 71.065056318474 | 65.109784325771 |
| N  | 91.307691682037 | 71.722773521412 | 69.177156600485 |
| Mg | 90.611030405030 | 72.677149538220 | 67.442167096746 |
| H  | 88.578485974299 | 71.241925153324 | 62.005903055177 |
| H  | 87.243642329497 | 72.378400284824 | 61.975840648782 |
| H  | 88.072050278487 | 74.243247318189 | 72.365144206114 |
| H  | 94.170987155880 | 69.129543871157 | 70.530091883566 |
| H  | 93.514011913525 | 69.326720519731 | 72.152791939662 |
| H  | 85.467196529719 | 75.578843312759 | 71.402181497050 |
| H  | 86.116085226478 | 75.382828933932 | 73.128376413692 |
| H  | 95.861290282790 | 70.130622189904 | 72.073120188383 |
| H  | 94.780823044908 | 71.502011574663 | 72.392090334738 |
| H  | 95.459705028589 | 71.261407149219 | 70.758252002676 |
| H  | 90.247477650738 | 70.299041214313 | 62.432483440350 |
| H  | 92.587750315367 | 73.924537953554 | 60.452643657779 |
| H  | 93.703708904006 | 72.521181042842 | 60.393433517203 |
| H  | 94.023551555616 | 73.860840341938 | 61.554418773708 |
| H  | 86.817296830883 | 74.878349977361 | 66.349479328851 |
| H  | 89.664212304432 | 73.076938639480 | 71.814108219647 |
| H  | 93.841950305297 | 69.555489702340 | 68.479539696829 |
| H  | 87.629857858284 | 76.204496152911 | 64.216640132537 |
| H  | 87.957962529385 | 75.616125236465 | 62.571073358343 |
| H  | 89.285569479247 | 75.775339095435 | 63.749258910312 |
| H  | 85.410897217505 | 75.104417930935 | 67.814384123980 |
| H  | 85.683926135675 | 76.228441385412 | 69.156793131547 |
| H  | 84.961079810292 | 74.651009206721 | 69.469370926736 |
| H  | 92.301248450828 | 70.784464471374 | 73.410463658995 |
| H  | 90.672038446879 | 71.478205819829 | 73.265423413381 |
| H  | 92.102197253313 | 72.529414596246 | 73.232532609775 |
| H  | 94.827456481944 | 68.494774076761 | 64.894195423001 |
| H  | 93.858084928110 | 67.556638327094 | 66.061191372909 |
| H  | 94.996765766819 | 68.782389214693 | 66.638206175366 |
| H  | 89.341000000000 | 73.467000000000 | 62.436000000000 |
| H  | 86.935000000000 | 73.827000000000 | 64.029000000000 |
| O  | 91.264107715861 | 68.685785072229 | 60.120002850295 |
| H  | 91.172342632366 | 67.719172715537 | 59.998245874916 |
| H  | 91.744587932533 | 68.793309095972 | 60.994539062445 |
| H  | 93.924641603743 | 78.137043396562 | 67.932986809437 |
| H  | 90.439381521685 | 74.778351969544 | 56.887093136813 |
| H  | 87.372890734290 | 71.218220336778 | 63.301388860486 |

**C6**  
85

|   |                  |                 |                 |
|---|------------------|-----------------|-----------------|
| C | 107.143995063652 | 60.720112847273 | 64.958542399277 |
| H | 107.745781255096 | 60.863921916631 | 65.862975172716 |
| H | 107.308325167790 | 61.583058826800 | 64.303823259606 |



|    |                   |                 |                 |
|----|-------------------|-----------------|-----------------|
| C  | 105.701274850629  | 60.588193219663 | 65.294442355566 |
| N  | 104.740654688500  | 60.326493117567 | 64.328026033183 |
| H  | 104.911245497922  | 60.060825829122 | 63.349524123210 |
| C  | 103.536767123945  | 60.232252514454 | 64.936447464451 |
| H  | 102.611988306310  | 59.997600123119 | 64.418769249022 |
| N  | 103.660572438269  | 60.451605855827 | 66.237943895588 |
| C  | 105.002749624446  | 60.675931466224 | 66.475881298176 |
| H  | 105.384678278917  | 60.870453849887 | 67.472681098861 |
| C  | 97.539667998666   | 61.092761914117 | 64.740941401694 |
| C  | 103.5610555074686 | 65.396234549929 | 70.026833470045 |
| C  | 104.178281827148  | 57.616628808090 | 71.901224925327 |
| C  | 99.583698595029   | 56.486191617809 | 65.221253026195 |
| N  | 100.633099737692  | 61.152499931873 | 65.934438204330 |
| C  | 103.965721099741  | 66.672630049993 | 69.889327826376 |
| C  | 103.063561690472  | 57.249879195490 | 72.895165852427 |
| C  | 99.353353851735   | 57.837416618761 | 64.402922564872 |
| N  | 102.249984079938  | 62.587313702329 | 68.005401797398 |
| O  | 99.129457397233   | 55.409515538908 | 64.837410695437 |
| C  | 100.084087698535  | 57.669927053899 | 63.076449501801 |
| N  | 101.287553784762  | 58.683412068110 | 67.409938758698 |
| C  | 102.204542832028  | 56.989685555622 | 62.166773120357 |
| C  | 99.944173740312   | 58.930292528971 | 65.287741740225 |
| C  | 101.102693083583  | 63.559639922613 | 66.062031066515 |
| C  | 103.544763472000  | 62.285755352640 | 70.066919724386 |
| C  | 102.407506705715  | 57.613030688479 | 69.302857467558 |
| C  | 100.590025162971  | 62.689738675670 | 62.985713319395 |
| C  | 102.156125865336  | 66.253022024155 | 67.275907825816 |
| C  | 105.094457698128  | 60.684052963690 | 72.282574076210 |
| C  | 101.179405257841  | 54.956728470657 | 67.985739899639 |
| C  | 99.900265120666   | 60.306223333640 | 65.141522524193 |
| C  | 101.881192066119  | 63.652138068504 | 67.237291624823 |
| C  | 103.503356903389  | 60.880951115351 | 70.204186278032 |
| C  | 101.612808450162  | 57.542375359710 | 68.142526444467 |
| O  | 99.576377362625   | 57.788903089825 | 61.968322797351 |
| C  | 98.993956096055   | 61.102332850059 | 64.216612267050 |
| C  | 102.363656372660  | 64.890076468482 | 67.827221471595 |
| C  | 104.173000673976  | 60.118340174880 | 71.251235337839 |
| C  | 101.052229276749  | 56.365205014688 | 67.513799429242 |
| O  | 101.366182733605  | 57.323189549769 | 63.297804014760 |
| C  | 99.687693409827   | 62.486872382476 | 64.210960065106 |
| C  | 103.004790392959  | 64.537053487465 | 69.004075048089 |
| C  | 103.821536471379  | 58.798753876498 | 71.055310708940 |
| C  | 100.392087647803  | 56.845126130222 | 66.367074203499 |
| C  | 100.517815764961  | 62.432549356838 | 65.493964729519 |
| C  | 102.944552476357  | 63.076113169580 | 69.085598770007 |
| C  | 102.962917990759  | 58.765984791847 | 69.874403515267 |
| C  | 100.578658425910  | 58.261397030368 | 66.361954721939 |
| N  | 102.799963777378  | 60.045840489132 | 69.386280792008 |
| Mg | 102.001905312525  | 60.605271232055 | 67.546155267534 |
| H  | 97.157906175168   | 60.063586631361 | 64.759944931744 |
| H  | 96.882668394026   | 61.667000759352 | 64.072911844202 |
| H  | 103.641197104300  | 64.947368193724 | 71.022259831565 |
| H  | 105.106107137946  | 57.821877211364 | 72.456954164609 |
| H  | 104.393612018153  | 56.747007355794 | 71.258101588397 |
| H  | 103.955789623262  | 67.206375091556 | 68.941528323199 |
| H  | 104.342930288852  | 67.211680922389 | 70.753118713142 |
| H  | 102.857670883239  | 58.089029172012 | 73.574099590340 |
| H  | 103.347101512823  | 56.378561107979 | 73.503090489319 |

|   |                  |                 |                 |
|---|------------------|-----------------|-----------------|
| H | 102.127038756697 | 57.013128047490 | 72.370603182131 |
| H | 98.286400516979  | 57.957613399272 | 64.168001901856 |
| H | 102.633830944542 | 57.908084051586 | 61.744427916515 |
| H | 101.638544576703 | 56.444432316676 | 61.403810913858 |
| H | 103.005657876609 | 56.365780181647 | 62.573078735212 |
| H | 100.902524689924 | 64.502575882586 | 65.549779113814 |
| H | 104.118887298771 | 62.816805695351 | 70.827617930714 |
| H | 102.628683597333 | 56.668277086755 | 69.802948712285 |
| H | 99.993741449417  | 62.717740899717 | 62.059744248524 |
| H | 101.321022607869 | 61.870884395145 | 62.901854487129 |
| H | 101.149137374396 | 63.632148466922 | 63.062928392280 |
| H | 101.856060985902 | 66.953280012776 | 68.069779519474 |
| H | 101.382545588486 | 66.259912338417 | 66.501049431441 |
| H | 103.078756771725 | 66.649354579781 | 66.821536460738 |
| H | 105.490260963587 | 59.898712466390 | 72.936966265862 |
| H | 104.609803309184 | 61.436030449193 | 72.919911820174 |
| H | 105.954690620179 | 61.187002577095 | 71.812846863046 |
| H | 102.208590385892 | 54.586709290762 | 67.853530423349 |
| H | 100.512338904901 | 54.296499118781 | 67.417860176612 |
| H | 100.935764412245 | 54.864409646029 | 69.054967042778 |
| H | 98.970875935791  | 60.668036288856 | 63.203094236740 |
| H | 98.958481553036  | 63.311369184712 | 64.252337097204 |
| H | 107.486993266825 | 59.795057427159 | 64.450582389277 |
| H | 97.402577143414  | 61.503222004996 | 65.773127296058 |

**C7**  
82

|   |                  |                 |                 |
|---|------------------|-----------------|-----------------|
| C | 101.812000000000 | 74.147000000000 | 67.884000000000 |
| H | 101.678000000000 | 74.825000000000 | 67.025000000000 |
| H | 102.382000000000 | 74.635000000000 | 68.685000000000 |
| O | 102.459000000000 | 72.928000000000 | 67.508000000000 |
| H | 103.401000000000 | 73.118000000000 | 67.316000000000 |
| C | 104.465000000000 | 72.010000000000 | 70.146000000000 |
| C | 96.892000000000  | 66.752000000000 | 66.698000000000 |
| C | 102.306000000000 | 66.972000000000 | 60.799000000000 |
| C | 107.093000000000 | 70.352000000000 | 66.415000000000 |
| N | 102.607000000000 | 69.741000000000 | 68.062000000000 |
| C | 95.974000000000  | 66.214000000000 | 67.527000000000 |
| C | 103.085000000000 | 65.650000000000 | 60.887000000000 |
| C | 106.363000000000 | 70.648000000000 | 67.781000000000 |
| N | 100.103000000000 | 68.580000000000 | 66.782000000000 |
| O | 108.288000000000 | 70.553000000000 | 66.225000000000 |
| C | 107.059000000000 | 69.967000000000 | 68.951000000000 |
| N | 103.884000000000 | 69.205000000000 | 65.465000000000 |
| C | 107.942000000000 | 67.920000000000 | 69.723000000000 |
| C | 104.917000000000 | 70.184000000000 | 67.564000000000 |
| C | 100.389000000000 | 69.448000000000 | 69.065000000000 |
| C | 99.267000000000  | 67.380000000000 | 64.815000000000 |
| C | 103.723000000000 | 68.445000000000 | 63.150000000000 |
| C | 102.129000000000 | 69.687000000000 | 71.612000000000 |
| C | 97.480000000000  | 68.365000000000 | 69.445000000000 |
| C | 99.330000000000  | 66.348000000000 | 61.840000000000 |
| C | 106.803000000000 | 69.323000000000 | 63.066000000000 |
| C | 103.846000000000 | 70.194000000000 | 68.449000000000 |
| C | 99.647000000000  | 68.819000000000 | 68.049000000000 |
| C | 100.362000000000 | 67.541000000000 | 63.939000000000 |
| C | 104.456000000000 | 68.988000000000 | 64.214000000000 |

|    |                  |                 |                 |
|----|------------------|-----------------|-----------------|
| O  | 107.343000000000 | 70.497000000000 | 70.006000000000 |
| C  | 103.855000000000 | 70.621000000000 | 69.913000000000 |
| C  | 98.326000000000  | 68.242000000000 | 68.223000000000 |
| C  | 100.429000000000 | 67.045000000000 | 62.573000000000 |
| C  | 105.853000000000 | 69.381000000000 | 64.216000000000 |
| O  | 107.312000000000 | 68.670000000000 | 68.665000000000 |
| C  | 102.365000000000 | 70.466000000000 | 70.317000000000 |
| C  | 98.027000000000  | 67.583000000000 | 67.038000000000 |
| C  | 101.694000000000 | 67.348000000000 | 62.109000000000 |
| C  | 106.088000000000 | 69.831000000000 | 65.516000000000 |
| C  | 101.727000000000 | 69.843000000000 | 69.087000000000 |
| C  | 99.152000000000  | 67.833000000000 | 66.132000000000 |
| C  | 102.384000000000 | 68.028000000000 | 63.189000000000 |
| C  | 104.855000000000 | 69.718000000000 | 66.229000000000 |
| N  | 101.541000000000 | 68.154000000000 | 64.274000000000 |
| Mg | 101.920000000000 | 69.221000000000 | 66.047000000000 |
| H  | 103.956000000000 | 72.750000000000 | 69.515000000000 |
| H  | 105.531000000000 | 72.022000000000 | 69.895000000000 |
| H  | 96.798000000000  | 66.526000000000 | 65.632000000000 |
| H  | 102.972000000000 | 67.778000000000 | 60.451000000000 |
| H  | 101.517000000000 | 66.896000000000 | 60.037000000000 |
| H  | 96.004000000000  | 66.349000000000 | 68.606000000000 |
| H  | 95.186000000000  | 65.566000000000 | 67.143000000000 |
| H  | 103.912000000000 | 65.731000000000 | 61.607000000000 |
| H  | 103.505000000000 | 65.352000000000 | 59.914000000000 |
| H  | 102.428000000000 | 64.839000000000 | 61.235000000000 |
| H  | 106.430000000000 | 71.731000000000 | 67.963000000000 |
| H  | 107.197000000000 | 67.643000000000 | 70.481000000000 |
| H  | 108.729000000000 | 68.517000000000 | 70.200000000000 |
| H  | 108.354000000000 | 67.029000000000 | 69.242000000000 |
| H  | 99.858000000000  | 69.575000000000 | 70.007000000000 |
| H  | 98.417000000000  | 66.827000000000 | 64.412000000000 |
| H  | 104.255000000000 | 68.305000000000 | 62.207000000000 |
| H  | 102.503000000000 | 70.244000000000 | 72.478000000000 |
| H  | 102.638000000000 | 68.716000000000 | 71.586000000000 |
| H  | 101.061000000000 | 69.491000000000 | 71.773000000000 |
| H  | 96.419000000000  | 68.479000000000 | 69.172000000000 |
| H  | 97.766000000000  | 69.237000000000 | 70.048000000000 |
| H  | 97.549000000000  | 67.477000000000 | 70.092000000000 |
| H  | 99.308000000000  | 65.267000000000 | 62.054000000000 |
| H  | 99.441000000000  | 66.455000000000 | 60.751000000000 |
| H  | 98.340000000000  | 66.735000000000 | 62.121000000000 |
| H  | 106.979000000000 | 68.293000000000 | 62.723000000000 |
| H  | 107.770000000000 | 69.756000000000 | 63.346000000000 |
| H  | 106.411000000000 | 69.875000000000 | 62.198000000000 |
| H  | 104.454000000000 | 69.872000000000 | 70.457000000000 |
| H  | 101.925000000000 | 71.473000000000 | 70.428000000000 |
| O  | 101.535000000000 | 71.215000000000 | 65.753000000000 |
| H  | 101.875000000000 | 71.854000000000 | 66.449000000000 |
| H  | 101.197000000000 | 71.796000000000 | 65.048000000000 |
| H  | 100.819857000000 | 73.894143000000 | 68.292571000000 |
| H  | 104.396429000000 | 72.428571000000 | 71.176000000000 |

**C8**  
88

|   |                 |                 |                 |
|---|-----------------|-----------------|-----------------|
| C | 96.212002418105 | 79.573444006904 | 62.726824265818 |
| H | 96.113178490932 | 79.171658970183 | 63.743477333323 |

|    |                  |                 |                 |
|----|------------------|-----------------|-----------------|
| H  | 96.766303091423  | 78.849494049062 | 62.110145787337 |
| C  | 96.923622617470  | 80.880380448324 | 62.780137489744 |
| N  | 97.290614739638  | 81.588693347005 | 61.647702541293 |
| H  | 97.065456049817  | 81.382873268754 | 60.658365867204 |
| C  | 97.945567841841  | 82.702960902311 | 62.041793076729 |
| H  | 98.324659252607  | 83.447222343743 | 61.350921990609 |
| N  | 98.026124902752  | 82.762254499137 | 63.368086677330 |
| C  | 97.383898801690  | 81.634243241325 | 63.838002395982 |
| H  | 97.271210443107  | 81.439656121796 | 64.897820679919 |
| C  | 101.457741777628 | 87.001491646284 | 60.252839364510 |
| C  | 102.481829676886 | 81.821146373134 | 67.911233482247 |
| C  | 95.409052594277  | 85.641358384256 | 68.572898139744 |
| C  | 96.599665339080  | 87.551910979383 | 60.771037925856 |
| N  | 100.189131778642 | 84.835239581554 | 62.521470963150 |
| C  | 103.416114662022 | 80.860629813172 | 68.051847495454 |
| C  | 95.412639487147  | 87.070256740687 | 69.128121627133 |
| C  | 97.848950374349  | 86.812720270355 | 60.149636872009 |
| N  | 100.692404832293 | 83.611787846044 | 65.200616602749 |
| O  | 95.830012543002  | 88.208013142264 | 60.078970844546 |
| C  | 97.366373793643  | 85.751640470934 | 59.178522064463 |
| N  | 97.709433828616  | 85.906378845323 | 63.698622504049 |
| C  | 98.042210651224  | 84.184333704278 | 57.538216839408 |
| C  | 98.537441251113  | 86.130388696877 | 61.331071361243 |
| C  | 102.138010615343 | 83.520286189886 | 63.213641863934 |
| C  | 99.843533759284  | 83.441915662462 | 67.496023259050 |
| C  | 96.276009274619  | 86.189416300476 | 65.649060211453 |
| C  | 101.771929325474 | 83.195070012937 | 60.067890959849 |
| C  | 104.010455439980 | 81.886093717058 | 65.095200863862 |
| C  | 97.972266600116  | 84.095925411925 | 69.906078921449 |
| C  | 94.699804161751  | 88.181897223101 | 63.698597970493 |
| C  | 99.769933424383  | 85.502377587687 | 61.400593033385 |
| C  | 101.820812307146 | 83.202805736057 | 64.551125854634 |
| C  | 98.651588529355  | 84.187988477859 | 67.383586141046 |
| C  | 96.603090241331  | 86.483103241206 | 64.317251574698 |
| O  | 96.252952141698  | 85.244467076146 | 59.157786481217 |
| C  | 100.879783350124 | 85.574705510895 | 60.367653869902 |
| C  | 102.670513608496 | 82.435287951707 | 65.440986309178 |
| C  | 97.735790761474  | 84.473675979985 | 68.482140448089 |
| C  | 95.888083006154  | 87.337244275466 | 63.390438892802 |
| O  | 98.344135658434  | 85.365491966515 | 58.321513077966 |
| C  | 101.867697884314 | 84.499330629660 | 60.871904662512 |
| C  | 102.030759263795 | 82.418326131139 | 66.672241283969 |
| C  | 96.685575608536  | 85.184271915774 | 67.936135550068 |
| C  | 96.580943772152  | 87.208523444678 | 62.177666067488 |
| C  | 101.408472137819 | 84.275792431574 | 62.307160157270 |
| C  | 100.786135956169 | 83.172696645970 | 66.501279624555 |
| C  | 97.011481687356  | 85.384861078583 | 66.530345119806 |
| C  | 97.677379769324  | 86.328955150925 | 62.435756013581 |
| N  | 98.189134918244  | 84.738346315387 | 66.222162419868 |
| Mg | 99.007819041257  | 84.434084875537 | 64.326663216291 |
| H  | 100.781614209792 | 87.624998767520 | 59.657823824739 |
| H  | 102.429245933813 | 86.973239430838 | 59.743207090113 |
| H  | 101.976491557680 | 82.171686483598 | 68.817377289024 |
| H  | 95.145300351088  | 84.952556251882 | 69.382403617216 |
| H  | 94.606526950065  | 85.550753358355 | 67.823134597204 |
| H  | 103.941138668704 | 80.410678259883 | 67.211806009940 |
| H  | 103.647369076652 | 80.447582968084 | 69.031655158743 |
| H  | 95.742226406897  | 87.794754933054 | 68.369600284953 |

|   |                  |                 |                 |
|---|------------------|-----------------|-----------------|
| H | 96.081843167036  | 87.152600721024 | 69.993209628167 |
| H | 94.405374395866  | 87.357407869398 | 69.462529120534 |
| H | 98.482496355699  | 87.546358211484 | 59.629438435790 |
| H | 98.943727578396  | 83.984958017158 | 56.950542937644 |
| H | 97.185810385790  | 84.373120486768 | 56.877572044758 |
| H | 97.795348417691  | 83.335542741532 | 58.187466448511 |
| H | 103.084759373803 | 83.124524492809 | 62.841696280288 |
| H | 100.060107234242 | 83.048292351553 | 68.490596453039 |
| H | 95.368432944971  | 86.647426199911 | 66.046086992700 |
| H | 102.081397546475 | 83.349734877806 | 59.023181749080 |
| H | 100.736513176952 | 82.821522219572 | 60.062375151643 |
| H | 102.402019608802 | 82.409215796096 | 60.506349506459 |
| H | 104.727011765952 | 82.053474778908 | 65.913109815616 |
| H | 104.416334208157 | 82.350607486416 | 64.189044790393 |
| H | 103.986168030329 | 80.801081462781 | 64.910985616167 |
| H | 98.877577691644  | 84.586204651094 | 70.297488950333 |
| H | 98.132226764660  | 83.014836885961 | 70.035926576725 |
| H | 97.134321192773  | 84.396348761021 | 70.542568724118 |
| H | 93.915418144755  | 87.607812635370 | 64.212541539343 |
| H | 94.269134518186  | 88.590777532283 | 62.778737897808 |
| H | 94.971482050503  | 89.023379031524 | 64.356954513510 |
| H | 100.490421039635 | 85.298870616866 | 59.379877256775 |
| H | 102.906996527486 | 84.865535108672 | 60.846843030177 |
| O | 98.801903198594  | 89.723680458424 | 61.338288438225 |
| H | 98.838886868992  | 89.379982738160 | 62.245688036978 |
| H | 99.404622637301  | 90.497010655249 | 61.335295438262 |
| H | 95.191117856033  | 79.697669909424 | 62.308198212604 |
| H | 101.598620984311 | 87.518738624495 | 61.229843402774 |

**C9**

91

|   |                  |                 |                 |
|---|------------------|-----------------|-----------------|
| C | 112.231601448480 | 79.264739847073 | 64.394074052524 |
| H | 112.998091165317 | 79.124943672995 | 63.618893753726 |
| H | 112.408587807293 | 78.524307888592 | 65.190048746320 |
| C | 110.846874582298 | 79.126000870546 | 63.851681136882 |
| N | 110.494257402590 | 78.390640522974 | 62.731256027769 |
| H | 111.111207268865 | 77.951245264970 | 62.038809195305 |
| C | 109.138658117228 | 78.403513875809 | 62.627255125895 |
| H | 108.594841417204 | 77.914032142007 | 61.826052637772 |
| N | 108.598829921982 | 79.100337501000 | 63.618869199187 |
| C | 109.651331769031 | 79.552164155086 | 64.383382416413 |
| H | 109.480113587685 | 80.149756683517 | 65.273921559346 |
| C | 101.737283822947 | 74.257645906570 | 67.813923610687 |
| H | 101.511632305577 | 75.041848014882 | 67.071179085803 |
| H | 102.388316818007 | 74.676979904787 | 68.595757792804 |
| O | 102.343825338913 | 73.116914119191 | 67.218749626018 |
| H | 103.287457544627 | 73.336817798885 | 67.055446678858 |
| C | 108.369448199811 | 77.964339331199 | 69.043654870921 |
| C | 108.033150601967 | 84.796551539228 | 62.394207375087 |
| C | 103.992476843215 | 78.732766176255 | 59.189442994528 |
| C | 105.202436290460 | 75.190134242653 | 66.493152876580 |
| N | 106.931073420848 | 79.687604616075 | 66.369614049484 |
| C | 108.679861123884 | 85.971123892270 | 62.528504983203 |
| C | 102.503688160903 | 79.115609014666 | 59.148991109762 |
| C | 105.704155383536 | 76.233180320606 | 67.580140568793 |
| N | 107.040726337526 | 81.759220924879 | 64.221116777643 |
| O | 104.932707953376 | 74.019545492861 | 66.755393406048 |

|    |                  |                 |                 |
|----|------------------|-----------------|-----------------|
| C  | 104.527971157878 | 76.439222349236 | 68.533912502526 |
| N  | 105.604514673066 | 77.971158625926 | 64.345165611849 |
| C  | 102.459274623723 | 77.605287977364 | 68.766141237097 |
| C  | 106.097009183363 | 77.464122972263 | 66.776270755269 |
| C  | 107.855965380460 | 81.954399050223 | 66.527780076374 |
| C  | 106.400721834216 | 82.241558466158 | 61.899634639240 |
| C  | 104.784742167117 | 77.646136820914 | 62.068486364568 |
| C  | 106.933948883159 | 81.305805763645 | 69.467866982417 |
| C  | 108.913972930841 | 84.729349736201 | 65.521560328763 |
| C  | 105.128380381130 | 81.679811619242 | 59.055328675379 |
| C  | 104.215595832075 | 74.668480692938 | 63.156902943291 |
| C  | 106.723465535053 | 78.622319213141 | 67.211379389623 |
| C  | 107.677582172963 | 82.443699191458 | 65.219135092223 |
| C  | 105.759307142588 | 81.039866395034 | 61.531517833552 |
| C  | 105.043046964728 | 77.161445089999 | 63.360722253067 |
| O  | 104.339891129355 | 75.794138609783 | 69.538314639289 |
| C  | 107.235496024175 | 78.905254300270 | 68.614448409079 |
| C  | 108.131810121651 | 83.732973798320 | 64.732464746417 |
| C  | 105.177159332786 | 80.756540418137 | 60.230346317233 |
| C  | 104.756311131358 | 75.842476165967 | 63.897855063187 |
| O  | 103.678298773397 | 77.378587802944 | 68.033455113514 |
| C  | 107.690667028655 | 80.381916589961 | 68.520187413359 |
| C  | 107.737797628665 | 83.805480410421 | 63.400257290329 |
| C  | 104.728155098268 | 79.450946185885 | 60.276899304862 |
| C  | 105.135713624532 | 75.915686741876 | 65.243072820050 |
| C  | 107.484893094310 | 80.718223116028 | 67.056198686168 |
| C  | 107.024153135208 | 82.562140743926 | 63.109625030267 |
| C  | 105.045206950861 | 78.947298757657 | 61.602952908355 |
| C  | 105.648766598862 | 77.231360215439 | 65.455865407331 |
| N  | 105.665438326910 | 79.937744107204 | 62.335190885141 |
| Mg | 106.614478585648 | 79.738369081811 | 64.195151986497 |
| H  | 109.263897096333 | 78.163039928658 | 68.437426495030 |
| H  | 108.094519477422 | 76.908660820541 | 68.928085872831 |
| H  | 107.733681633127 | 84.501751987896 | 61.385344124117 |
| H  | 104.086874507585 | 77.643530265600 | 59.313049946430 |
| H  | 104.459769315797 | 78.968925560375 | 58.217940476420 |
| H  | 109.018989209782 | 86.350191834923 | 63.488841409431 |
| H  | 108.910378634755 | 86.579413634176 | 61.656408739166 |
| H  | 101.996057136217 | 78.756073886322 | 60.054033353039 |
| H  | 101.999988997483 | 78.690374613711 | 58.269011541515 |
| H  | 102.379087797426 | 80.206825950831 | 59.109806610842 |
| H  | 106.502757080476 | 75.770123734251 | 68.173330821101 |
| H  | 101.652397113216 | 77.656093222481 | 68.026920646564 |
| H  | 102.543595859585 | 78.564481544570 | 69.294010540016 |
| H  | 102.281823713996 | 76.797929875915 | 69.486061049804 |
| H  | 108.335330709960 | 82.630203730652 | 67.237732213157 |
| H  | 106.430174695979 | 83.010320200399 | 61.126438164718 |
| H  | 104.306545064049 | 76.960368557857 | 61.366025579306 |
| H  | 107.199581036716 | 82.359681054657 | 69.319211562234 |
| H  | 107.139903678574 | 81.039090411653 | 70.513903858036 |
| H  | 105.854776002079 | 81.211064278766 | 69.314788057929 |
| H  | 109.946732196230 | 84.820467933898 | 65.146287088284 |
| H  | 108.974309713535 | 84.444891977532 | 66.579408170652 |
| H  | 108.473992790514 | 85.736500382439 | 65.472336001677 |
| H  | 105.758664425791 | 81.307755995877 | 58.229395277121 |
| H  | 105.483702846132 | 82.686851531522 | 59.302145903448 |
| H  | 104.107896338866 | 81.780850013641 | 58.655425361860 |
| H  | 103.564221395673 | 74.066090751075 | 63.805643265896 |

|   |                  |                 |                 |
|---|------------------|-----------------|-----------------|
| H | 105.033972402959 | 74.004978976502 | 62.830657654182 |
| H | 103.656770062075 | 74.974102808786 | 62.261821251141 |
| H | 106.388851306823 | 78.809981470388 | 69.313526571042 |
| H | 108.768165185229 | 80.463389362412 | 68.735808775228 |
| H | 112.380159215574 | 80.277277827089 | 64.825761495171 |
| H | 100.784604345917 | 73.948548286209 | 68.293694766532 |
| H | 108.695082225093 | 78.088874807682 | 70.096877951636 |

**C10**

85

|   |                  |                 |                 |
|---|------------------|-----------------|-----------------|
| C | 111.615243175576 | 83.717566247831 | 68.181911071621 |
| H | 111.451641991399 | 84.436354573578 | 67.369275283954 |
| H | 111.701146574917 | 82.721485486337 | 67.729499622508 |
| C | 110.502513983314 | 83.786948425552 | 69.164529658056 |
| N | 110.179743395754 | 82.738458497861 | 70.004237697251 |
| H | 110.595654588335 | 81.800058503892 | 69.942617351387 |
| C | 109.219403582849 | 83.160992889117 | 70.859450442379 |
| H | 108.756759508627 | 82.544843661817 | 71.623176965274 |
| N | 108.892751826073 | 84.420180649926 | 70.601348961932 |
| C | 109.686370760259 | 84.825468247316 | 69.552200976809 |
| H | 109.619407926865 | 85.832092489368 | 69.151389597410 |
| C | 105.557872703878 | 85.773586606752 | 66.559200732767 |
| C | 106.103381266142 | 81.208136205444 | 74.929164637788 |
| C | 110.955570288194 | 87.524271418606 | 75.681510169247 |
| C | 107.634237448489 | 89.871530416990 | 68.548515250522 |
| N | 105.959011361792 | 85.586184974187 | 69.983078641957 |
| C | 105.517527445828 | 80.003353028577 | 75.079641893105 |
| C | 110.316483427499 | 88.338322837972 | 76.817639836145 |
| C | 106.696272280246 | 88.743282086212 | 67.906516426828 |
| N | 106.399506415630 | 83.992100137092 | 72.501994589038 |
| O | 107.831847229185 | 90.953776043531 | 68.004925163651 |
| C | 105.330496593975 | 89.263901741858 | 67.530233280090 |
| N | 107.995772512512 | 87.425683332723 | 71.080434239714 |
| C | 103.228046091317 | 89.890274965045 | 68.381166094752 |
| C | 106.681064754371 | 87.623001227952 | 68.933017258444 |
| C | 104.822418335161 | 83.536094495298 | 70.668781503217 |
| C | 107.701746613823 | 83.844459395058 | 74.579536430574 |
| C | 109.547010939560 | 88.009657153604 | 72.881544787205 |
| C | 102.707046237174 | 85.107012616953 | 68.878086693595 |
| C | 104.384264567020 | 80.853481544183 | 72.260936399050 |
| C | 109.767839587178 | 84.778846953234 | 76.758719797216 |
| C | 109.891786596982 | 90.679318470555 | 71.129024407975 |
| C | 105.903354481002 | 86.481688865653 | 68.950314271941 |
| C | 105.475222358018 | 83.204006325793 | 71.876542984137 |
| C | 108.472442737168 | 85.019874931608 | 74.482228292146 |
| C | 108.902441196822 | 88.308518693788 | 71.663690349427 |
| O | 104.918090725747 | 89.416612687218 | 66.392273921411 |
| C | 104.877063253695 | 86.073163107012 | 67.902658175375 |
| C | 105.261686072041 | 81.990180034226 | 72.640249084011 |
| C | 109.445845411836 | 85.462619527834 | 75.471104450316 |
| C | 109.031515241018 | 89.498912829054 | 70.851486514699 |
| O | 104.590898485967 | 89.518301583910 | 68.635601374244 |
| C | 104.185682576950 | 84.854219375466 | 68.567582040917 |
| C | 106.042519330089 | 82.090428443435 | 73.784058893926 |
| C | 109.972988182950 | 86.639402453834 | 74.988742651734 |
| C | 108.158788212419 | 89.297149161751 | 69.767362200861 |
| C | 105.024629744073 | 84.620824306231 | 69.821217501735 |

|    |                  |                 |                 |
|----|------------------|-----------------|-----------------|
| C  | 106.763237853211 | 83.358373512065 | 73.669946773731 |
| C  | 109.320567113143 | 86.900806836959 | 73.708104180245 |
| C  | 107.571640400867 | 88.012891181296 | 69.959333584979 |
| N  | 108.416995624138 | 85.894861776216 | 73.435841930389 |
| Mg | 107.409602335674 | 85.552079254966 | 71.632939578429 |
| H  | 106.160669333797 | 84.861022573489 | 66.661738806451 |
| H  | 106.224244210842 | 86.596178305021 | 66.267125184016 |
| H  | 106.635815048407 | 81.605984650025 | 75.796266804270 |
| H  | 111.414942952561 | 88.198844939554 | 74.946078093523 |
| H  | 111.781210817733 | 86.916068323874 | 76.080653757027 |
| H  | 104.946874281066 | 79.507873007634 | 74.298414564016 |
| H  | 105.563220900721 | 79.495483252699 | 76.039545936428 |
| H  | 109.420708595792 | 88.868833560599 | 76.467357716030 |
| H  | 111.018714684249 | 89.078231037358 | 77.226450781338 |
| H  | 110.011555048545 | 87.683233286385 | 77.644570025339 |
| H  | 107.171306984753 | 88.448595620409 | 66.957181598239 |
| H  | 102.704995586577 | 89.085532909422 | 67.850411653266 |
| H  | 103.187852203458 | 90.801188426205 | 67.770511035641 |
| H  | 102.781522075091 | 90.056234129058 | 69.366304868721 |
| H  | 104.063011535767 | 82.831613025322 | 70.331788432353 |
| H  | 107.864270848706 | 83.248150386287 | 75.477739613067 |
| H  | 110.285135475141 | 88.732839001217 | 73.233540190324 |
| H  | 102.586897417226 | 86.055411038610 | 69.420684592162 |
| H  | 102.286644707026 | 84.308366852235 | 69.504751978703 |
| H  | 102.125325753123 | 85.158997659778 | 67.948386498064 |
| H  | 104.958537039434 | 79.922970559762 | 72.131220038392 |
| H  | 103.861456508810 | 81.048028448139 | 71.320214292270 |
| H  | 103.628656314341 | 80.658221426026 | 73.036040326193 |
| H  | 110.696370855313 | 85.168589561703 | 77.197680098770 |
| H  | 109.886626203934 | 83.692997181348 | 76.631648911854 |
| H  | 108.971423221429 | 84.918420855446 | 77.504116537561 |
| H  | 110.272873902886 | 91.110403920211 | 70.193415364173 |
| H  | 110.744249056025 | 90.428183178338 | 71.771118844313 |
| H  | 109.340495532760 | 91.476540998321 | 71.651445972294 |
| H  | 104.151813900151 | 86.891345415200 | 67.778887542657 |
| H  | 104.258726717105 | 83.967614038061 | 67.918104740420 |
| H  | 112.594926852982 | 83.986136670314 | 68.632756357964 |
| H  | 104.892823758290 | 85.588013289713 | 65.685654169236 |

## C11

85

|   |                  |                 |                 |
|---|------------------|-----------------|-----------------|
| C | 105.597287991285 | 86.918990609775 | 60.499319014152 |
| H | 104.596190950549 | 86.917473342008 | 60.943107274287 |
| H | 106.040369658541 | 85.925893330988 | 60.663671234191 |
| C | 106.508435683942 | 87.943797121369 | 61.142827392460 |
| O | 107.577930942663 | 88.260368956548 | 60.577990370471 |
| N | 106.125967398083 | 88.447261851872 | 62.318126495001 |
| H | 106.737669039535 | 89.099547197024 | 62.810240560975 |
| H | 105.310083856831 | 88.080653566474 | 62.812168629363 |
| C | 112.912016724884 | 89.037603990758 | 56.719402834903 |
| C | 110.200040596092 | 88.931077857412 | 66.070296308015 |
| C | 105.338077991612 | 94.006308652806 | 62.299788106227 |
| C | 108.620551318019 | 90.881914946497 | 55.486768830767 |
| N | 110.549128109703 | 88.946756842443 | 59.474716587810 |
| C | 110.531966682556 | 88.004718564601 | 66.989814952860 |
| C | 106.047339163167 | 95.355661494512 | 62.513922875699 |
| C | 109.794615158684 | 89.848593288003 | 55.799170919021 |



|    |                  |                 |                 |
|----|------------------|-----------------|-----------------|
| N  | 109.935999072977 | 89.290682381082 | 62.390816277866 |
| O  | 108.370533965806 | 91.287234321655 | 54.345676962663 |
| C  | 109.609993063962 | 88.556108324238 | 55.035508667165 |
| N  | 108.282987624334 | 90.801751589057 | 59.002265544191 |
| C  | 109.987156458204 | 87.489738863011 | 52.946882135620 |
| C  | 109.784678437088 | 89.680816742584 | 57.309878492639 |
| C  | 111.709409638837 | 87.931377884878 | 61.382888010637 |
| C  | 108.501022915276 | 90.471123697303 | 63.999364479759 |
| C  | 106.704093026303 | 92.437053907297 | 59.917292247096 |
| C  | 113.091225760921 | 86.394549807741 | 59.034356298979 |
| C  | 112.272632055756 | 87.153693121010 | 64.406238175812 |
| C  | 106.373311765536 | 92.554780303917 | 64.956350559928 |
| C  | 106.318321865173 | 93.144402352701 | 56.792489244671 |
| C  | 110.696137631268 | 89.018926903488 | 58.111371294619 |
| C  | 110.975890139018 | 88.408666076225 | 62.485734861662 |
| C  | 107.732186977239 | 91.266835551756 | 63.121279311356 |
| C  | 107.332301294314 | 91.808911609623 | 58.821966208520 |
| O  | 109.041685087633 | 87.568587537350 | 55.456361642213 |
| C  | 111.944338186894 | 88.281197228137 | 57.648078122104 |
| C  | 111.234182773110 | 88.083507830491 | 63.883996808047 |
| C  | 106.749430088104 | 92.256054937404 | 63.542885885393 |
| C  | 107.178249315492 | 92.104271204469 | 57.417739533316 |
| O  | 110.169954291310 | 88.642853287959 | 53.800826340214 |
| C  | 112.595490151281 | 87.836275164154 | 58.982692007018 |
| C  | 110.331922533853 | 88.823732206538 | 64.629679231999 |
| C  | 106.275000805451 | 92.843361591291 | 62.390223340263 |
| C  | 108.049100498885 | 91.215650075974 | 56.760908782599 |
| C  | 111.560260272653 | 88.233385392807 | 60.028448678838 |
| C  | 109.525217892364 | 89.581524063029 | 63.670779223686 |
| C  | 106.936774761350 | 92.176387963313 | 61.272839591068 |
| C  | 108.713954415777 | 90.473618605511 | 57.783988908611 |
| N  | 107.820638681149 | 91.228057868791 | 61.757113080475 |
| Mg | 108.921691713209 | 89.794289232058 | 60.669894830713 |
| H  | 112.547424478273 | 89.071499012919 | 55.683902717548 |
| H  | 113.883485403046 | 88.520589138908 | 56.711387913400 |
| H  | 109.787532811894 | 89.877204985992 | 66.430013950530 |
| H  | 104.559528857025 | 93.892992306801 | 63.068597571169 |
| H  | 104.825480384188 | 94.000734529107 | 61.324823575880 |
| H  | 110.917909256246 | 87.021476622336 | 66.721215647916 |
| H  | 110.402716332154 | 88.210547080311 | 68.052435497658 |
| H  | 105.396209570343 | 96.196947846107 | 62.239130837088 |
| H  | 106.965621218497 | 95.418718705962 | 61.914315651815 |
| H  | 106.323412416092 | 95.492103225589 | 63.567649590742 |
| H  | 110.707671209620 | 90.331791093699 | 55.422732270547 |
| H  | 109.812036131299 | 86.602918342735 | 53.563567168734 |
| H  | 110.897553383205 | 87.389318305954 | 52.347848040279 |
| H  | 109.124897673863 | 87.666605328120 | 52.292690349782 |
| H  | 112.548109545160 | 87.278075696872 | 61.624762935274 |
| H  | 108.288866080041 | 90.597916422139 | 65.062407519607 |
| H  | 105.958287761114 | 93.198945161865 | 59.683824659216 |
| H  | 113.636508549271 | 86.190513597806 | 59.965844788535 |
| H  | 113.788188785977 | 86.193526894826 | 58.207145271137 |
| H  | 112.269633554726 | 85.670511426269 | 58.980739562268 |
| H  | 113.063551537961 | 86.967868629127 | 63.672434550023 |
| H  | 111.848181488451 | 86.175581957123 | 64.682613462382 |
| H  | 112.743096895958 | 87.558732965627 | 65.313850974606 |
| H  | 105.840856773628 | 91.707663590809 | 65.414469997206 |
| H  | 105.724176256595 | 93.437524340918 | 65.021105353889 |

|   |                  |                 |                 |
|---|------------------|-----------------|-----------------|
| H | 107.259563312111 | 92.745133612049 | 65.579495906342 |
| H | 106.900774632628 | 93.759313220208 | 56.095583190412 |
| H | 105.844262330299 | 93.797457374333 | 57.532810583875 |
| H | 105.524269801286 | 92.681080891433 | 56.188170222436 |
| H | 111.613144745089 | 87.400975662132 | 57.078335743598 |
| H | 113.477936313770 | 88.476452294167 | 59.150711738504 |
| O | 109.560329068426 | 94.930195815086 | 53.347420370291 |
| H | 108.812954711720 | 95.330338270332 | 53.837644256609 |
| H | 109.137668295588 | 94.232907729936 | 52.801741362452 |
| H | 105.548358452107 | 87.098273617295 | 59.399615265200 |
| H | 113.093600037826 | 90.084645046364 | 57.043624327252 |

## C12

88

|   |                  |                 |                 |
|---|------------------|-----------------|-----------------|
| C | 110.874191475704 | 68.427061914790 | 68.297187407198 |
| H | 110.009632418263 | 67.927086050062 | 67.835627805046 |
| H | 110.506537350906 | 69.054643536241 | 69.124720375456 |
| C | 111.635983926243 | 69.241942967747 | 67.301353943674 |
| N | 111.018975112665 | 70.129061379565 | 66.443442462243 |
| H | 110.012951792232 | 70.291065489010 | 66.370297781700 |
| C | 111.958880475450 | 70.723119409333 | 65.672760121747 |
| H | 111.740795585147 | 71.473620718584 | 64.920065786883 |
| N | 113.164258347922 | 70.264244208239 | 65.986331788871 |
| C | 112.978208590687 | 69.348961741470 | 66.999701714543 |
| H | 113.822693058932 | 68.828236547543 | 67.441872950393 |
| C | 115.025814455289 | 72.871781918308 | 70.532273444832 |
| C | 118.131951499006 | 66.496456532865 | 63.973880770229 |
| C | 114.273716603513 | 72.059587684490 | 59.705258521065 |
| C | 113.695651362981 | 75.955150000336 | 66.790377708368 |
| N | 115.720243394032 | 71.621228333173 | 67.324391961116 |
| C | 119.193645644076 | 65.721011823427 | 64.267538961429 |
| C | 115.238640987690 | 73.196753190825 | 59.331437634896 |
| C | 114.239798587182 | 75.116194040381 | 68.027107593621 |
| N | 116.308791428871 | 69.403447922679 | 65.377941140987 |
| O | 113.339450245874 | 77.129248788909 | 66.889389439865 |
| C | 115.276563341122 | 75.937966582392 | 68.760028996517 |
| N | 114.368661390489 | 72.955275458839 | 65.052014786582 |
| C | 117.462562084203 | 76.805858049419 | 68.694628916134 |
| C | 114.676504034063 | 73.787776061456 | 67.425067565081 |
| C | 116.954973103950 | 69.549734529143 | 67.746789138451 |
| C | 116.327322248034 | 68.826597459965 | 62.995379766435 |
| C | 113.941933593279 | 73.055442756523 | 62.647275828463 |
| C | 118.411150582551 | 71.793937391356 | 69.408474398199 |
| C | 118.331439849672 | 66.824436708201 | 67.179878508682 |
| C | 115.766506551047 | 69.200288665449 | 59.948153627325 |
| C | 112.891019190890 | 75.989064345327 | 63.370894122415 |
| C | 115.416698650002 | 72.772809643616 | 68.005615313509 |
| C | 116.894405862081 | 68.894152132184 | 66.503195430213 |
| C | 115.602393571977 | 69.911640276027 | 62.463552077239 |
| C | 113.889772500118 | 73.627941906748 | 63.929830783236 |
| O | 115.085616204021 | 76.549023231945 | 69.794569114827 |
| C | 116.047701928422 | 72.793380436054 | 69.391380988402 |
| C | 117.628591153636 | 67.683138525712 | 66.187080109719 |
| C | 115.353097011222 | 70.127945962125 | 61.045169592789 |
| C | 113.461539602207 | 74.962775406810 | 64.282588144805 |
| O | 116.459805127402 | 75.968670818758 | 68.092287048927 |
| C | 116.907098875100 | 71.501806762332 | 69.382920549554 |

|    |                  |                 |                 |
|----|------------------|-----------------|-----------------|
| C  | 117.525317015911 | 67.507755479927 | 64.814991135924 |
| C  | 114.684690590619 | 71.330761364551 | 60.945284109628 |
| C  | 113.725101496121 | 75.069633064440 | 65.656725516102 |
| C  | 116.499603850722 | 70.822164527827 | 68.086942952515 |
| C  | 116.671990362204 | 68.595420101917 | 64.327756905433 |
| C  | 114.526187835006 | 71.828720159324 | 62.305968952752 |
| C  | 114.271517842692 | 73.817211969802 | 66.068289834156 |
| N  | 115.084663659401 | 70.938743740069 | 63.200486333188 |
| Mg | 115.027697230826 | 71.027068326729 | 65.312947135765 |
| H  | 114.458796342130 | 71.933431203873 | 70.599579566839 |
| H  | 114.304318230635 | 73.683995905198 | 70.384062723978 |
| H  | 117.669365995465 | 66.358809680198 | 62.993073409568 |
| H  | 113.259307067330 | 72.472712460501 | 59.828671060588 |
| H  | 114.215577718486 | 71.355874596143 | 58.863251007055 |
| H  | 119.745577274640 | 65.807813453679 | 65.202310284652 |
| H  | 119.552415825658 | 64.976569231328 | 63.556518579261 |
| H  | 114.942519408361 | 73.663213617234 | 58.383149200869 |
| H  | 116.261513754458 | 72.812647427715 | 59.209000081453 |
| H  | 115.265904033091 | 73.967341335210 | 60.114171848123 |
| H  | 113.390966147643 | 75.009128629824 | 68.722347925557 |
| H  | 117.088416471971 | 77.833026186883 | 68.801285548557 |
| H  | 118.320648212442 | 76.770665195987 | 68.015398163753 |
| H  | 117.739869378894 | 76.428255009270 | 69.688523264698 |
| H  | 117.543418696237 | 69.044358625229 | 68.514444040933 |
| H  | 116.696694303950 | 68.102362884613 | 62.267503902607 |
| H  | 113.535874832560 | 73.648204600086 | 61.825978026398 |
| H  | 119.004228865334 | 70.877110082257 | 69.291913611510 |
| H  | 118.689701960239 | 72.264384093732 | 70.358473388410 |
| H  | 118.680480552266 | 72.482225771232 | 68.594985549769 |
| H  | 118.267455883593 | 65.767416822162 | 66.882537604275 |
| H  | 117.891079192998 | 66.925315233086 | 68.181201854990 |
| H  | 119.403170131609 | 67.072447556387 | 67.265725895656 |
| H  | 116.855525473439 | 69.211003638991 | 59.776361928642 |
| H  | 115.277355149706 | 69.455994915868 | 58.999087751554 |
| H  | 115.508454601381 | 68.155268092878 | 60.177903034303 |
| H  | 112.674062685752 | 75.590103621725 | 62.373375679845 |
| H  | 113.580115999246 | 76.839335071631 | 63.258683714382 |
| H  | 111.961113637788 | 76.397468856193 | 63.788812404835 |
| H  | 116.713227530196 | 73.672273150852 | 69.444357013974 |
| H  | 116.661290064781 | 70.855557069238 | 70.239855441473 |
| O  | 112.210408726182 | 77.492103475710 | 69.424332730205 |
| H  | 112.933247224305 | 77.285525245109 | 70.043619301448 |
| H  | 112.654121794288 | 77.461156701394 | 68.544723941666 |
| H  | 111.536522988710 | 67.641415985472 | 68.712488074945 |
| H  | 115.512287775048 | 73.070129416747 | 71.512756623173 |

### C13

101

|   |                  |                 |                 |
|---|------------------|-----------------|-----------------|
| C | 123.539516043735 | 83.991346107025 | 60.861465912903 |
| H | 124.324448950527 | 84.582327176024 | 61.352340500307 |
| H | 123.068696463805 | 83.360591053402 | 61.625756407981 |
| C | 124.056189892033 | 83.140776609506 | 59.724518477926 |
| C | 124.927743149147 | 83.650070318217 | 58.750067371571 |
| H | 125.357250855329 | 84.645840353859 | 58.890202401584 |
| C | 125.244164300259 | 82.922736320553 | 57.601904734320 |
| H | 125.907650759211 | 83.334014361312 | 56.838461678858 |
| C | 124.704731740178 | 81.642175972526 | 57.414282301720 |

|    |                  |                 |                 |
|----|------------------|-----------------|-----------------|
| O  | 124.993648253728 | 80.978560868099 | 56.255202503599 |
| H  | 124.539905715427 | 80.102575721665 | 56.281564260944 |
| C  | 123.892078628689 | 81.088039492858 | 58.412494475652 |
| H  | 123.512825640215 | 80.071648415821 | 58.298545244613 |
| C  | 123.575740804892 | 81.835352755153 | 59.544956528254 |
| H  | 122.920319619897 | 81.393403149915 | 60.299650951505 |
| C  | 119.014569482519 | 81.534698093669 | 59.833898275720 |
| H  | 118.849244216666 | 81.855509703385 | 60.866250325472 |
| H  | 118.050608324771 | 81.282040358820 | 59.366869115083 |
| C  | 119.907444069254 | 80.348156397084 | 59.830514847026 |
| N  | 120.201167370213 | 79.645118854376 | 58.675726660466 |
| H  | 119.827377443926 | 79.885557585206 | 57.748935547809 |
| C  | 121.016713256703 | 78.612467739821 | 58.999016491974 |
| H  | 121.433115517149 | 77.917803158608 | 58.277019110300 |
| N  | 121.256952808539 | 78.609034075429 | 60.306578512754 |
| C  | 120.571324714289 | 79.684546058850 | 60.835526153093 |
| H  | 120.601049092224 | 79.916011589365 | 61.894611788942 |
| C  | 123.986724375293 | 73.430878758288 | 57.820885221995 |
| C  | 118.423214229173 | 75.474901200445 | 65.015747275754 |
| C  | 124.952124591120 | 80.024462137468 | 65.731438662514 |
| C  | 126.425917865814 | 77.908668110625 | 58.050263220806 |
| N  | 122.465307703204 | 75.736791789824 | 59.815685863060 |
| C  | 117.519033482869 | 74.565693614815 | 65.424406881697 |
| C  | 126.115523100338 | 79.142446566525 | 66.212910930015 |
| C  | 125.340689515881 | 76.843310479153 | 57.487510225702 |
| N  | 120.903438696495 | 76.102155765566 | 62.343032328998 |
| O  | 127.402947515074 | 78.263419387756 | 57.397523249087 |
| C  | 124.671362876286 | 77.538256130044 | 56.330111556233 |
| N  | 124.291909199985 | 77.796745641164 | 60.871804485300 |
| C  | 124.574781313514 | 77.886619216090 | 54.006537812257 |
| C  | 124.391047812741 | 76.606313953312 | 58.651210090375 |
| C  | 120.432701706491 | 74.545870900041 | 60.505514482655 |
| C  | 120.930164022473 | 77.199277887249 | 64.536019786341 |
| C  | 124.954499051377 | 79.249186850243 | 62.716254698028 |
| C  | 120.463039131115 | 74.742773094470 | 57.310969346152 |
| C  | 118.101486175168 | 73.612705551942 | 62.376927251872 |
| C  | 122.286862544724 | 78.705713870743 | 66.949722803390 |
| C  | 127.241523570147 | 80.127672793479 | 60.663496621572 |
| C  | 123.331758300678 | 75.719242869613 | 58.750992965688 |
| C  | 120.172859041671 | 75.097599318223 | 61.775087732226 |
| C  | 122.112797519658 | 77.961755397760 | 64.431456259025 |
| C  | 125.139792979276 | 78.760428389667 | 61.411595933593 |
| O  | 123.805561315681 | 78.403145545705 | 56.445499658900 |
| C  | 122.984375242825 | 74.596121498124 | 57.790478012394 |
| C  | 119.100361571381 | 74.681454268307 | 62.664926233317 |
| C  | 122.752192554292 | 78.676645147550 | 65.530816133675 |
| C  | 126.190421617600 | 79.088845828851 | 60.480689616768 |
| O  | 125.173123913629 | 77.182296448738 | 55.131229864509 |
| C  | 121.556424504628 | 74.205334752053 | 58.240229629057 |
| C  | 119.210166030696 | 75.471530080337 | 63.800419130921 |
| C  | 123.892268430401 | 79.253295120178 | 65.009604432388 |
| C  | 125.949040816220 | 78.275235094613 | 59.358853722486 |
| C  | 121.464034925240 | 74.842014244412 | 59.618675525809 |
| C  | 120.372212199173 | 76.341885698042 | 63.586217864652 |
| C  | 123.935409910068 | 78.884955016323 | 63.601844147221 |
| C  | 124.777293683747 | 77.516151354295 | 59.662179739151 |
| N  | 122.842971807808 | 78.101434497322 | 63.285868581319 |
| Mg | 122.406431329786 | 77.193622026610 | 61.437266430989 |

|   |                  |                 |                 |
|---|------------------|-----------------|-----------------|
| H | 124.975161960351 | 73.750988778482 | 57.469476011079 |
| H | 123.648125699884 | 72.635282146572 | 57.143914862174 |
| H | 118.613074299862 | 76.317801735338 | 65.687105637463 |
| H | 124.511149453052 | 80.538954562648 | 66.594273954241 |
| H | 125.349149925690 | 80.816716456105 | 65.074999772525 |
| H | 117.257505301403 | 73.681026594656 | 64.849169561439 |
| H | 117.013440941041 | 74.695858456291 | 66.377596581494 |
| H | 126.884295054897 | 79.748435752088 | 66.714292271044 |
| H | 126.585327394149 | 78.614428736619 | 65.370525497249 |
| H | 125.760759391741 | 78.384126668556 | 66.925217541329 |
| H | 125.883463277266 | 75.956306882665 | 57.132569648985 |
| H | 125.058193074102 | 77.489313513302 | 53.114253547491 |
| H | 124.751636843290 | 78.964122939374 | 54.091610261402 |
| H | 123.500997416245 | 77.673248248610 | 53.969613138902 |
| H | 119.746376854333 | 73.766012697037 | 60.172187416832 |
| H | 120.435880276018 | 77.231038783223 | 65.507455054341 |
| H | 125.705631751763 | 79.941232796863 | 63.100965657609 |
| H | 120.531930371888 | 74.274810317415 | 56.317592670963 |
| H | 120.555112581612 | 75.832005902459 | 57.183199709598 |
| H | 119.465119949581 | 74.539626887441 | 57.722292416005 |
| H | 117.088127773630 | 73.910963057089 | 62.683377231249 |
| H | 118.332807778256 | 72.680027436565 | 62.916976304528 |
| H | 118.070658622018 | 73.368820801586 | 61.307560047853 |
| H | 122.697304016281 | 79.574783156713 | 67.480504196769 |
| H | 122.610157099642 | 77.801308070430 | 67.488929813175 |
| H | 121.190149220265 | 78.754689038351 | 67.018779304501 |
| H | 127.301536218296 | 80.464758517671 | 61.707439622670 |
| H | 127.005570169873 | 81.008583058462 | 60.040581450452 |
| H | 128.231740280063 | 79.755071601844 | 60.363337561589 |
| H | 122.973738053689 | 74.975440161005 | 56.755636948486 |
| H | 121.444083669951 | 73.114212204858 | 58.311906512437 |
| H | 122.764130245710 | 84.724519649378 | 60.515645065281 |
| H | 119.464784702153 | 82.394796200562 | 59.293341891174 |
| H | 124.146738270111 | 72.958577772272 | 58.816146234436 |

**Chlz-D1**

85

|   |                 |                 |                 |
|---|-----------------|-----------------|-----------------|
| C | 74.262563985213 | 71.123412331221 | 80.117565905605 |
| H | 73.769119465405 | 71.791709448703 | 80.836845934254 |
| H | 73.714470602571 | 71.175474918901 | 79.176104413151 |
| C | 74.245771185811 | 69.719040797239 | 80.602696086463 |
| N | 74.330675436432 | 69.393259259388 | 81.939210128041 |
| H | 74.346849822224 | 70.084876872216 | 82.695319247842 |
| C | 74.267613373371 | 68.051122322530 | 82.072028949681 |
| H | 74.352929362359 | 67.551618907842 | 83.032252395283 |
| N | 74.156662561833 | 67.480554495341 | 80.873713375949 |
| C | 74.142889422558 | 68.508559140395 | 79.952877337883 |
| H | 74.059758776347 | 68.303176523821 | 78.891229153148 |
| C | 78.530702283773 | 63.997715282684 | 83.267952862898 |
| C | 75.462887735030 | 64.992402060849 | 75.101818173794 |
| C | 69.072378397676 | 63.466921866207 | 79.628329005121 |
| C | 74.136383715966 | 65.007163678305 | 85.843619663373 |
| N | 76.343713104462 | 65.441916625541 | 81.580743439550 |
| C | 76.215830422429 | 65.323990283855 | 74.036047866856 |
| C | 68.981431869899 | 61.958042756539 | 79.910291326950 |
| C | 75.600705893942 | 65.424580050728 | 85.355773709265 |
| N | 75.370184029827 | 65.272846447487 | 78.772471341957 |

|    |                 |                 |                 |
|----|-----------------|-----------------|-----------------|
| O  | 73.788087442666 | 64.947012566673 | 87.012620579339 |
| C  | 75.817032200061 | 66.896056808054 | 85.720460402597 |
| N  | 73.590117203864 | 64.737501838497 | 82.350465250437 |
| C  | 76.470937078026 | 68.408251756296 | 87.419707758570 |
| C  | 75.566425203347 | 65.235457824859 | 83.848415272745 |
| C  | 77.625700435104 | 65.888572978265 | 79.542443249160 |
| C  | 73.446857385197 | 64.632725016687 | 77.381933812665 |
| C  | 71.293718097776 | 64.203958518299 | 81.716813946557 |
| C  | 78.508840004928 | 67.746761079346 | 82.131294292813 |
| C  | 78.294764638389 | 65.737011148012 | 76.479290614429 |
| C  | 70.488067949114 | 63.780360054283 | 76.753806725635 |
| C  | 70.860645256101 | 64.124669151139 | 84.870909567382 |
| C  | 76.587750503446 | 65.408635285805 | 82.927749945478 |
| C  | 76.683190944007 | 65.587759875900 | 78.537340655600 |
| C  | 72.456875258925 | 64.431133062245 | 78.359419429843 |
| C  | 72.276338600034 | 64.438782821271 | 82.687721545074 |
| O  | 75.501259095278 | 67.823957192466 | 84.989943810698 |
| C  | 78.089832385185 | 65.472698994723 | 83.180172525315 |
| C  | 76.963855880532 | 65.522173088187 | 77.117668326017 |
| C  | 71.084187432652 | 64.023365853607 | 78.101688033781 |
| C  | 72.114451330334 | 64.426899331243 | 84.129230241359 |
| O  | 76.355782261258 | 67.038312483467 | 86.933487447745 |
| C  | 78.550577219300 | 66.223270120306 | 81.914447347436 |
| C  | 75.768838978915 | 65.166569507628 | 76.499109412164 |
| C  | 70.469675107899 | 63.913152183320 | 79.332046954175 |
| C  | 73.373387095561 | 64.758923759988 | 84.633742750516 |
| C  | 77.471695246275 | 65.813849516401 | 80.923608863968 |
| C  | 74.783520338753 | 65.004051459232 | 77.563012748887 |
| C  | 71.480475596459 | 64.244573147007 | 80.327035069430 |
| C  | 74.231601597352 | 64.929845967609 | 83.507586401159 |
| N  | 72.662123975633 | 64.570846100616 | 79.702123653288 |
| Mg | 74.398075308809 | 65.381932494002 | 80.584829363763 |
| H  | 78.123374935534 | 63.443671491203 | 82.409653732868 |
| H  | 78.099344961254 | 63.559463665919 | 84.175996547512 |
| H  | 74.481659229878 | 64.556889258656 | 74.891596990943 |
| H  | 68.412666414429 | 63.721557931165 | 78.783621761563 |
| H  | 68.674967460098 | 64.023265837510 | 80.492292713886 |
| H  | 77.200574423621 | 65.773380600454 | 74.135033527194 |
| H  | 75.827556880915 | 65.163513943208 | 73.031714308286 |
| H  | 69.614955586010 | 61.682014235543 | 80.765669745253 |
| H  | 69.328622084370 | 61.378312760959 | 79.042329372907 |
| H  | 67.947979397865 | 61.656204171961 | 80.135350490374 |
| H  | 76.333293270414 | 64.798092059634 | 85.881170519182 |
| H  | 75.471882399834 | 68.848488306235 | 87.500109029877 |
| H  | 77.073223454263 | 69.007058270201 | 86.729593778516 |
| H  | 76.949748108558 | 68.338612794682 | 88.399520299366 |
| H  | 78.616930010492 | 66.190687693350 | 79.200156961548 |
| H  | 73.136633717054 | 64.439660541745 | 76.355246295932 |
| H  | 70.292788346103 | 63.953817049091 | 82.072773203721 |
| H  | 79.228226274248 | 68.045136842923 | 82.907563393426 |
| H  | 77.506267891932 | 68.061682710944 | 82.458449321710 |
| H  | 78.753113873194 | 68.287876616527 | 81.206641825600 |
| H  | 78.521507879540 | 64.934016387063 | 75.760043581878 |
| H  | 79.103835145693 | 65.761679041390 | 77.220300261128 |
| H  | 78.332034648803 | 66.685749186380 | 75.919336492213 |
| H  | 70.721367481134 | 64.608323395998 | 76.067789316412 |
| H  | 69.395202025092 | 63.680856478685 | 76.812014064459 |
| H  | 70.873382445384 | 62.862433644399 | 76.281155295019 |

|   |                 |                 |                 |
|---|-----------------|-----------------|-----------------|
| H | 70.315071681284 | 63.289352547383 | 84.408877010274 |
| H | 70.173489935444 | 64.984990433343 | 84.882180359927 |
| H | 71.089585874695 | 63.871466727396 | 85.911884344828 |
| H | 78.357156858166 | 66.013662744120 | 84.098746856976 |
| H | 79.551459072961 | 65.925325060334 | 81.573082536503 |
| H | 75.289165037607 | 71.507529442906 | 79.946925804049 |
| H | 79.616943226798 | 63.779397450177 | 83.304050133430 |

## REFERENCES

1. Y. Umena, K. Kawakami, J.-R. Shen and N. Kamiya, *Nature*, 2011, **473**, 55-60.
2. S. Schott-Verdugo and H. Gohlke, *J. Chem. Inf. Model.*, 2019, **59**, 2522-2528.
3. J. A. Maier, C. Martinez, K. Kasavajhala, L. Wickstrom, K. E. Hauser and C. Simmerling, *J. Chem. Theory Comput.*, 2015, **11**, 3696-3713.
4. W. L. Jorgensen, J. Chandrasekhar, J. D. Madura, R. W. Impey and M. L. Klein, *J. Chem. Phys.*, 1983, **79**, 926-935.
5. C. J. Dickson, B. D. Madej, Å. A. Skjevik, R. M. Betz, K. Teigen, I. R. Gould and R. C. Walker, *J. Chem. Theory Comput.*, 2014, **10**, 865-879.
6. J. Wang, R. M. Wolf, J. W. Caldwell, P. A. Kollman and D. A. Case, *J. Comput. Chem.*, 2004, **25**, 1157-1174.
7. A. Sirohiwal and D. A. Pantazis, *Acc. Chem. Res.*, 2023, **56**, 2921-2932.
8. N. Sakashita, H. C. Watanabe, T. Ikeda, K. Saito and H. Ishikita, *Biochemistry*, 2017, **56**, 3049-3057.
9. F. Guerra, M. Siemers, C. Mielack and A.-N. Bondar, *J. Phys. Chem. B*, 2018, **122**, 4625-4641.
10. M. Ceccarelli, P. Procacci and M. Marchi, *J. Comput. Chem.*, 2003, **24**, 129-142.
11. F. Guerra, S. Adam and A.-N. Bondar, *J. Mol. Graphics Modell.*, 2015, **58**, 30-39.
12. P. Li and K. M. Merz, *Chem. Rev.*, 2017, **117**, 1564-1686.
13. I. S. Joung and T. E. Cheatham, III, *J. Phys. Chem. B*, 2009, **113**, 13279-13290.
14. I. S. Joung and T. E. Cheatham, III, *J. Phys. Chem. B*, 2008, **112**, 9020-9041.
15. R. J. Loncharich, B. R. Brooks and R. W. Pastor, *Biopolymers*, 1992, **32**, 523-535.
16. H. J. C. Berendsen, J. P. M. Postma, W. F. van Gunsteren, A. DiNola and J. R. Haak, *J. Chem. Phys.*, 1984, **81**, 3684-3690.
17. J.-P. Ryckaert, G. Ciccotti and H. J. C. Berendsen, *J. Comput. Phys.*, 1977, **23**, 327-341.
18. U. Essmann, L. Perera, M. L. Berkowitz, T. Darden, H. Lee and L. G. Pedersen, *J. Chem. Phys.*, 1995, **103**, 8577-8593.
19. D. A. Case, T. E. Cheatham III, T. Darden, H. Gohlke, R. Luo, K. M. Merz Jr., A. Onufriev, C. Simmerling, B. Wang and R. J. Woods, *J. Comput. Chem.*, 2005, **26**, 1668-1688.
20. R. Salomon-Ferrer, A. W. Götz, D. Poole, S. Le Grand and R. C. Walker, *J. Chem. Theory Comput.*, 2013, **9**, 3878-3888.
21. S. Barazzouk, L. Bekalé and S. Hotchandani, *J. Mater. Chem.*, 2012, **22**, 25316-25324.
22. F. Müh, M. Plöckinger, H. Ortmayer, M. Schmidt am Busch, D. Lindorfer, J. Adolphs and T. Renger, *J. Photochem. Photobiol., B*, 2015, **152**, 286-300.
23. Y. Shibata, S. Nishi, K. Kawakami, J.-R. Shen and T. Renger, *J. Am. Chem. Soc.*, 2013, **135**, 6903-6914.
24. P. Sarnagadharan, S. Maity and U. Kleinekathöfer, *J. Chem. Phys.*, 2022, **156**.
25. K. Saito, K. Mitsunashi, H. Tamura and H. Ishikita, *Biophys. J.*, 2023, **122**, 470-483.
26. F. H. M. Koua, Y. Umena, K. Kawakami and J.-R. Shen, *Proc. Natl. Acad. Sci. U. S. A.*, 2013, **110**, 3889-3894.
27. I. Schelter, J. M. Foerster, A. T. Gardiner, A. W. Roszak, R. J. Cogdell, G. M. Ullmann, T. B. de Queiroz and S. Kümmel, *J. Chem. Phys.*, 2019, **151**.
28. T. Yanai, D. P. Tew and N. C. Handy, *Chem. Phys. Lett.*, 2004, **393**, 51-57.
29. Y. Tawada, T. Tsuneda, S. Yanagisawa, T. Yanai and K. Hirao, *J. Chem. Phys.*, 2004, **120**, 8425-8433.
30. J.-D. Chai and M. Head-Gordon, *J. Chem. Phys.*, 2008, **128**.



31. N. Mardirossian and M. Head-Gordon, *Phys. Chem. Chem. Phys.*, 2014, **16**, 9904.
32. M. Casanova-Páez, M. B. Dardis and L. Goerigk, *J. Chem. Theory Comput.*, 2019, **15**, 4735-4744.
33. H. Iikura, T. Tsuneda, T. Yanai and K. Hirao, *J. Chem. Phys.*, 2001, **115**, 3540-3544.
